# Supplementary material for: Comparison of Antibiotic Resistance of <em>Escherichia coli</em> Populations from Water or Sediment in Rivers Environments
Source: Preprints.org preprint supplement (doi:10.20944/preprints202306.1800.v1), 2023-06-26
Supplement: Supplementary file 1 [file supplementary]

## Sheet: Sheet1
Sample Name	Cluster	Sample	AM	AMC	CN	CXM	FOX	CTX	TZP	IPM	CAZ	MEM	FEP	GM	AN	MXF	CIP	NA	TE	TGC	CL	SXT	C
KD01EC001	Mur_1	sediment	R	R	S	S	S	S	S	S	S	S	S	S	S	S	R	S	S	S	S	S	S
KD01EC054	Mur_1	sediment	S	S	S	S	S	S	S	S	S	S	S	S	S	S	S	S	S	S	S	S	S
KD01EC008	Mur_2	sediment	R	S	S	S	S	S	S	S	S	S	S	R	S	S	S	R	R	S	S	R	R
KD01EC238	Mur_2	water	S	S	S	S	S	S	S	S	S	S	S	S	S	S	S	S	S	S	S	S	S
W02EC071	Mur_2	water	S	S	S	S	S	S	S	S	S	S	S	S	S	S	S	S	S	S	S	S	S
KD01EC020	Mur_3	sediment	S	S	S	S	S	S	S	S	S	S	S	S	S	S	S	S	S	S	S	S	S
KD01EC186	Mur_3	water	R	R	R	R	R	R	R	S	R	S	S	S	S	S	S	S	R	S	S	R	S
KD01EC021	Mur_4	sediment	S	S	S	S	S	S	S	S	S	S	S	S	S	S	S	S	S	S	S	S	S
KD01EC044	Mur_4	sediment	S	S	S	S	S	S	S	S	S	S	S	S	S	S	S	S	S	S	S	S	S
KD01EC066	Mur_4	sediment	S	S	S	S	S	S	S	S	S	S	S	S	S	S	S	S	S	S	S	S	S
KD01EC137	Mur_4	sediment	S	S	S	S	S	S	S	S	S	S	S	S	S	S	S	S	S	S	S	S	S
KD01EC212	Mur_4	water	S	S	S	S	S	S	S	S	S	S	S	S	S	S	S	S	S	S	S	S	S
KD01EC215	Mur_4	water	S	S	S	S	S	S	S	S	S	S	S	S	S	S	S	S	S	S	S	S	S
KD01EC226	Mur_4	water	S	S	S	S	S	S	S	S	S	S	S	S	S	S	S	S	S	S	S	S	S
KD01EC231	Mur_4	water	S	S	S	S	S	S	S	S	S	S	S	S	S	S	S	S	S	S	S	S	S
KD01EC232	Mur_4	water	S	S	S	S	S	S	S	S	S	S	S	S	S	S	S	S	S	S	S	S	S
KD01EC243	Mur_4	water	S	S	S	S	S	S	S	S	S	S	S	S	S	S	S	S	S	S	S	S	S
KD01EC272	Mur_4	sediment	S	S	S	S	S	S	S	S	S	S	S	S	S	S	S	S	S	S	S	S	S
KD01EC022	Mur_5	sediment	S	S	S	S	S	S	S	S	S	S	S	S	S	S	S	S	S	S	S	S	S
KD01EC260	Mur_5	sediment	S	S	S	S	S	S	S	S	S	S	S	S	S	S	S	S	S	S	S	S	S
KD01EC023	Mur_6	sediment	S	S	S	S	S	S	S	S	S	S	S	S	S	S	S	S	S	S	S	S	S
KD01EC065	Mur_6	sediment	S	S	S	S	S	S	S	S	S	S	S	S	S	S	S	S	S	S	S	S	S
KD01EC187	Mur_6	water	S	S	S	S	S	S	S	S	S	S	S	S	S	S	S	S	S	S	S	S	S
KD01EC024	Mur_7	sediment	S	S	S	S	S	S	S	S	S	S	S	S	S	S	S	S	S	S	S	S	S
KD01EC085	Mur_7	sediment	S	S	S	S	S	S	S	S	S	S	S	S	S	S	S	S	S	S	S	S	S
KD01EC248	Mur_7	water	S	S	S	S	S	S	S	S	S	S	S	S	S	S	S	S	S	S	S	S	S
KD01EC025	Mur_8	sediment	S	S	S	S	S	S	S	S	S	S	S	S	S	S	S	S	S	S	S	S	S
W02EC002	Mur_8	water	S	S	S	S	S	S	S	S	S	S	S	S	S	S	S	S	S	S	S	S	S
W02EC008	Mur_8	water	S	S	S	S	S	S	S	S	S	S	S	S	S	S	S	S	S	S	S	S	S
W02EC021	Mur_8	sediment	S	S	S	S	S	S	S	S	S	S	S	S	S	S	S	S	S	S	S	S	S
W02EC023	Mur_8	sediment	S	S	S	S	S	S	S	S	S	S	S	S	S	S	S	S	S	S	S	S	S
W02EC041	Mur_8	water	S	S	S	S	S	S	S	S	S	S	S	S	S	S	S	S	S	S	S	S	S
W02EC044	Mur_8	water	S	S	S	S	S	S	S	S	S	S	S	S	S	S	S	S	S	S	S	S	S
W02EC051	Mur_8	water	S	S	S	S	S	S	S	S	S	S	S	S	S	S	S	S	S	S	S	S	S
W02EC075	Mur_8	water	S	S	S	S	S	S	S	S	S	S	S	S	S	S	S	S	S	S	S	S	S
W02EC081	Mur_8	water	S	S	S	S	S	S	S	S	S	S	S	S	S	S	S	S	S	S	S	S	S
W02EC102	Mur_8	water	S	S	S	S	S	S	S	S	S	S	S	S	S	S	S	S	S	S	S	S	S
W02EC109	Mur_8	water	S	S	S	S	S	S	S	S	S	S	S	S	S	S	S	S	S	S	S	S	S
W02EC116	Mur_8	water	S	S	S	S	S	S	S	S	S	S	S	S	S	S	S	S	S	S	S	S	S
W02EC123	Mur_8	water	S	S	S	S	S	S	S	S	S	S	S	S	S	S	S	S	S	S	S	S	S
W03EC019	Mur_8	water	S	S	S	S	S	S	S	S	S	S	S	S	S	S	S	S	S	S	S	S	S
W03EC025	Mur_8	sediment	S	S	S	S	S	R	S	S	S	S	S	S	S	S	S	S	S	S	S	S	S
W03EC027	Mur_8	sediment	S	S	S	S	S	S	S	S	S	S	S	S	S	S	S	S	S	S	S	S	S
W04EC017	Mur_8	sediment	S	S	S	S	S	S	S	S	S	S	S	S	S	S	S	S	S	S	S	S	S
W04EC022	Mur_8	sediment	S	S	S	S	S	S	S	S	S	S	S	S	S	S	S	S	S	S	S	S	S
W04EC026	Mur_8	sediment	S	S	S	S	S	S	S	S	S	S	S	S	S	S	S	S	S	S	S	S	S
W04EC041	Mur_8	sediment	S	S	S	S	S	S	S	S	S	S	S	S	S	S	S	S	S	S	S	S	S
KD01EC026	Mur_9	sediment	S	S	S	S	S	S	S	S	S	S	S	S	S	S	S	S	S	S	S	S	S
KD01EC127	Mur_9	sediment	S	S	S	S	S	S	S	S	S	S	S	S	S	S	S	S	S	S	S	S	S
KD01EC203	Mur_9	water	S	S	S	S	S	S	S	S	S	S	S	S	S	S	S	S	S	S	S	S	S
KD01EC277	Mur_9	sediment	S	S	S	S	S	S	S	S	S	S	S	S	S	S	S	S	S	S	S	S	S
KD01EC278	Mur_9	sediment	S	S	S	S	S	S	S	S	S	S	S	S	S	S	S	S	S	S	S	S	S
KD01EC027	Mur_10	sediment	S	S	S	S	S	S	S	S	S	S	S	S	S	S	S	S	S	S	S	S	S
KD01EC140	Mur_10	water	S	S	S	S	S	S	S	S	S	S	S	S	S	S	S	S	S	S	S	S	S
KD01EC142	Mur_10	water	S	S	S	S	S	S	S	S	S	S	S	S	S	S	S	S	S	S	S	S	S
KD01EC153	Mur_10	water	S	S	S	S	S	S	S	S	S	S	S	S	S	S	S	S	S	S	S	S	S
KD01EC154	Mur_10	water	S	S	S	S	S	S	S	S	S	S	S	S	S	S	S	S	S	S	S	S	S
KD01EC155	Mur_10	water	S	S	S	S	S	S	S	S	S	S	S	S	S	S	S	S	S	S	S	S	S
KD01EC178	Mur_10	water	S	S	S	S	S	S	S	S	S	S	S	S	S	S	S	S	S	S	S	S	S
KD01EC180	Mur_10	water	S	S	S	S	S	S	S	S	S	S	S	S	S	S	S	S	S	S	S	S	S
KD01EC185	Mur_10	water	S	S	S	S	S	S	S	S	S	S	S	S	S	S	S	S	S	S	S	S	S
KD01EC213	Mur_10	water	S	S	S	S	S	S	S	S	S	S	S	S	S	S	S	S	S	S	S	S	S
KD01EC227	Mur_10	water	S	S	S	S	S	S	S	S	S	S	S	S	S	S	S	S	S	S	S	S	S
KD01EC237	Mur_10	water	S	S	S	S	S	S	S	S	S	S	S	S	S	S	S	S	S	S	S	S	S
KD01EC259	Mur_10	sediment	R	S	S	S	S	S	S	S	S	S	S	S	S	S	S	S	S	S	S	R	S
KD01EC028	Mur_11	sediment	S	S	S	S	S	S	S	S	S	S	S	S	S	S	S	S	S	S	S	S	S
KD01EC120	Mur_11	sediment	S	S	S	S	S	S	S	S	S	S	S	S	S	S	S	S	S	S	S	S	S
KD01EC029	Mur_12	sediment	S	S	S	S	S	S	S	S	S	S	S	S	S	S	S	S	S	S	S	S	S
KD01EC194	Mur_12	water	S	S	S	S	S	S	S	S	S	S	S	S	S	S	S	S	S	S	S	S	S
KD01EC199	Mur_12	water	S	S	S	S	S	S	S	S	S	S	S	S	S	S	S	S	S	S	S	S	S
KD01EC252	Mur_12	water	S	S	S	S	S	S	S	S	S	S	S	S	S	S	S	S	S	S	S	S	S
KD01EC030	Mur_13	sediment	S	S	S	S	S	S	S	S	S	S	S	S	S	S	S	S	S	S	S	S	S
KD01EC032	Mur_13	sediment	S	S	S	S	S	S	S	S	S	S	S	S	S	S	S	S	S	S	S	S	S
KD01EC038	Mur_13	sediment	S	S	S	S	S	S	S	S	S	S	S	S	S	S	S	S	S	S	S	S	S
KD01EC049	Mur_13	sediment	S	S	S	S	S	S	S	S	S	S	S	S	S	S	S	S	S	S	S	S	S
KD01EC056	Mur_13	sediment	S	S	S	S	S	S	S	S	S	S	S	S	S	S	S	S	S	S	S	S	S
KD01EC099	Mur_13	sediment	S	S	S	S	S	S	S	S	S	S	S	S	S	S	S	S	S	S	S	S	S
KD01EC101	Mur_13	sediment	S	S	S	S	S	S	S	S	S	S	S	S	S	S	S	S	S	S	S	S	S
KD01EC125	Mur_13	sediment	S	S	S	S	S	S	S	S	S	S	S	S	S	S	S	R	S	S	S	S	S
KD01EC130	Mur_13	sediment	S	S	S	S	S	S	S	S	S	S	S	S	S	S	S	R	S	S	S	S	S
KD01EC168	Mur_13	water	S	S	S	S	S	S	S	S	S	S	S	S	S	S	S	S	S	S	S	S	S
KD01EC196	Mur_13	water	S	S	S	S	S	S	S	S	S	S	S	S	S	S	S	S	S	S	S	S	S
KD01EC210	Mur_13	water	S	S	S	S	S	S	S	S	S	S	S	S	S	S	S	S	S	S	S	S	S
KD01EC269	Mur_13	sediment	S	S	S	S	S	S	S	S	S	S	S	S	S	S	S	S	S	S	S	S	S
KD01EC281	Mur_13	sediment	S	S	S	S	S	S	S	S	S	S	S	S	S	S	S	S	S	S	S	S	S
KD01EC284	Mur_13	sediment	S	S	S	S	S	S	S	S	S	S	S	S	S	S	S	S	S	S	S	S	S
W02EC042	Mur_13	water	S	S	S	S	S	S	S	S	S	S	S	S	S	S	S	S	R	S	S	R	S
W02EC065	Mur_13	water	S	S	S	S	S	S	S	S	S	S	S	S	S	R	R	R	R	S	S	R	R
W02EC125	Mur_13	water	S	S	S	S	S	S	S	S	S	S	S	S	S	R	R	R	R	S	S	R	R
KD01EC031	Mur_14	sediment	S	S	S	S	S	S	S	S	S	S	S	S	S	S	S	S	S	S	S	S	S
KD01EC067	Mur_14	sediment	R	S	S	S	S	S	S	S	S	S	S	R	S	S	S	S	R	S	S	R	S
KD01EC080	Mur_14	sediment	R	R	S	S	S	S	S	S	S	S	S	R	S	S	S	S	R	S	S	R	S
KD01EC082	Mur_14	sediment	R	S	S	S	S	S	S	S	S	S	S	R	S	S	S	S	R	S	S	R	S
KD01EC204	Mur_14	water	R	S	S	S	S	S	S	S	S	S	S	S	S	S	S	S	S	S	S	R	S
KD01EC218	Mur_14	water	S	S	S	S	S	S	S	S	S	S	S	S	S	S	R	S	R	S	S	S	S
KD01EC258	Mur_14	sediment	R	R	R	R	S	S	S	S	R	S	S	R	S	S	S	S	R	S	S	S	S
W02EC018	Mur_14	sediment	S	S	S	S	S	S	S	S	S	S	S	S	S	S	S	S	S	S	S	S	S
W03EC024	Mur_14	water	S	S	S	S	S	S	S	S	S	S	S	S	S	S	S	S	R	S	S	S	S
W03EC026	Mur_14	sediment	S	S	S	S	S	S	S	S	S	S	S	S	S	S	S	S	S	S	S	S	S
KD01EC033	Mur_15	sediment	S	S	S	S	S	S	S	S	S	S	S	S	S	S	S	S	S	S	S	S	S
KD01EC041	Mur_15	sediment	S	S	S	S	S	S	S	S	S	S	S	S	S	S	S	S	S	S	S	S	S
KD01EC174	Mur_15	water	S	S	S	S	S	S	S	S	S	S	S	S	S	S	S	S	S	S	S	S	S
KD01EC035	Mur_16	sediment	S	S	S	S	S	S	S	S	S	S	S	S	S	S	S	R	S	S	S	S	S
KD01EC072	Mur_16	sediment	R	S	S	S	S	S	S	S	S	S	S	S	S	S	S	R	S	S	S	S	R
KD01EC129	Mur_16	sediment	S	S	S	S	S	S	S	S	S	S	S	S	S	S	S	S	S	S	S	S	S
KD01EC164	Mur_16	water	S	S	S	S	S	S	S	S	S	S	S	S	S	S	S	S	S	S	S	S	S
KD01EC266	Mur_16	sediment	R	S	S	S	S	S	S	S	S	S	S	S	S	S	S	S	S	S	S	S	S
KD01EC036	Mur_17	sediment	R	S	S	S	S	S	S	S	S	S	S	S	S	S	S	S	S	S	S	S	R
KD01EC265	Mur_17	sediment	S	S	S	S	S	S	S	S	S	S	S	S	S	S	S	R	S	S	S	S	S
KD01EC037	Mur_18	sediment	S	S	S	S	S	S	S	S	S	S	S	S	S	S	S	S	S	S	S	S	S
KD01EC053	Mur_18	sediment	R	S	S	S	S	S	S	S	S	S	S	S	S	S	S	S	R	S	S	S	S
KD01EC078	Mur_18	sediment	S	S	S	S	S	S	S	S	S	S	S	S	S	S	S	S	S	S	S	S	S
KD01EC139	Mur_18	water	S	S	S	S	S	S	S	S	S	S	S	S	S	R	R	R	S	S	S	S	S
KD01EC146	Mur_18	water	S	S	S	S	S	S	S	S	S	S	S	S	S	S	S	R	S	S	S	S	S
KD01EC148	Mur_18	water	S	S	S	S	S	S	S	S	S	S	S	S	S	S	S	S	S	S	S	S	S
KD01EC163	Mur_18	water	S	S	S	S	S	S	S	S	S	S	S	S	S	S	S	S	S	S	S	S	S
KD01EC275	Mur_18	sediment	R	S	S	S	S	S	S	S	S	S	S	S	S	R	R	R	R	S	S	R	S
KD01EC286	Mur_18	sediment	S	S	S	S	S	S	S	S	S	S	S	S	S	S	S	S	S	S	S	S	S
W02EC011	Mur_18	water	S	S	S	S	S	S	S	S	S	S	S	S	S	S	S	S	S	S	S	S	S
W02EC014	Mur_18	water	S	S	S	S	S	S	S	S	S	S	S	S	S	S	S	S	S	S	S	S	S
W02EC034	Mur_18	water	S	S	S	S	S	S	S	S	S	S	S	S	S	S	R	S	R	S	S	S	S
W02EC064	Mur_18	water	S	S	S	S	S	S	S	S	S	S	S	S	S	S	S	S	S	S	S	S	S
W02EC129	Mur_18	sediment	S	S	S	S	S	S	S	S	S	S	S	S	S	S	S	S	S	S	S	S	S
W03EC002	Mur_18	water	S	S	S	S	S	S	S	S	S	S	S	S	S	S	S	S	S	S	S	S	S
W04EC015	Mur_18	sediment	S	S	S	S	S	S	S	S	S	S	S	S	S	S	S	S	S	S	S	S	S
W04EC016	Mur_18	sediment	R	S	R	R	S	R	S	S	R	S	R	S	S	S	S	R	R	S	S	R	S
W04EC018	Mur_18	sediment	R	R	R	R	S	R	S	S	R	S	R	S	S	S	S	R	R	S	S	R	S
W04EC019	Mur_18	sediment	S	S	S	S	S	S	S	S	S	S	S	S	S	S	S	S	S	S	S	S	S
W04EC029	Mur_18	sediment	R	S	R	S	R	R	S	S	R	S	R	S	S	S	S	R	R	S	S	R	S
W04EC039	Mur_18	sediment	S	S	S	S	S	S	S	S	S	S	S	S	S	S	S	S	S	S	S	S	S
W04EC040	Mur_18	sediment	S	S	S	S	S	S	S	S	S	S	S	S	S	S	S	S	S	S	S	S	S
W04EC069	Mur_18	sediment	S	S	S	S	S	S	S	S	S	S	S	S	S	S	S	S	S	S	S	S	S
W04EC075	Mur_18	sediment	S	S	S	S	S	S	S	S	S	S	S	S	S	S	S	S	S	S	S	S	S
W04EC088	Mur_18	water	R	S	R	R	S	R	S	S	R	S	R	S	S	S	S	R	R	S	S	R	S
W04EC090	Mur_18	water	R	S	R	R	S	R	S	S	R	S	R	S	S	S	S	R	R	S	S	R	S
W04EC093	Mur_18	water	R	S	R	R	S	R	S	S	R	S	R	S	S	S	S	R	R	S	S	R	S
KD01EC039	Mur_19	sediment	S	S	S	S	S	S	S	S	S	S	S	S	S	S	S	S	S	S	S	S	S
KD01EC045	Mur_19	sediment	S	S	S	S	S	S	S	S	S	S	S	S	S	S	S	S	S	S	S	S	S
KD01EC106	Mur_19	sediment	S	S	S	S	S	S	S	S	S	S	S	S	S	S	S	S	S	S	S	S	S
KD01EC182	Mur_19	water	S	S	S	S	S	S	S	S	S	S	S	S	S	S	S	S	S	S	S	S	S
KD01EC255	Mur_19	water	S	S	S	S	S	S	S	S	S	S	S	S	S	S	S	S	S	S	S	S	S
KD01EC294	Mur_19	sediment	S	S	S	S	S	S	S	S	S	S	S	S	S	S	S	S	S	S	S	S	S
KD01EC040	Mur_20	sediment	R	R	S	S	S	S	R	S	S	S	S	S	S	S	S	S	R	S	S	S	R
KD01EC141	Mur_20	water	S	S	S	S	S	S	S	S	S	S	S	S	S	S	S	S	S	S	S	S	S
KD01EC161	Mur_20	water	S	S	S	S	S	S	S	S	S	S	R	S	S	S	S	S	S	S	S	S	S
KD01EC179	Mur_20	water	S	S	S	S	S	S	S	S	S	S	S	S	S	S	S	S	S	S	S	S	S
KD01EC208	Mur_20	water	S	S	S	S	S	S	S	S	S	S	S	S	S	S	S	S	S	S	S	S	S
KD01EC280	Mur_20	sediment	S	S	S	S	S	S	S	S	S	S	S	S	S	S	S	S	S	S	S	S	S
KD01EC297	Mur_20	sediment	S	S	S	S	S	S	S	S	S	S	S	S	S	S	S	S	S	S	S	S	S
KD01EC043	Mur_21	sediment	S	S	S	S	S	S	S	S	S	S	S	S	S	S	S	S	S	S	S	S	S
KD01EC273	Mur_21	sediment	R	S	S	S	S	S	S	S	S	S	S	S	S	R	S	R	R	S	S	S	S
KD01EC046	Mur_22	sediment	R	S	S	S	S	S	S	S	S	S	S	S	S	S	S	S	R	S	S	R	S
KD01EC069	Mur_22	sediment	S	S	S	S	S	S	S	S	S	S	S	S	S	S	R	S	S	S	S	S	R
KD01EC123	Mur_22	sediment	R	R	S	S	S	S	R	S	S	S	S	R	S	S	S	R	S	S	S	S	S
KD01EC048	Mur_23	sediment	S	S	S	S	S	S	S	S	S	S	S	S	S	S	S	S	S	S	S	S	S
W02EC004	Mur_23	water	S	S	S	S	S	S	S	S	S	S	S	S	S	S	S	S	S	S	S	S	S
W02EC039	Mur_23	water	S	S	S	S	S	S	S	S	S	S	S	S	S	S	S	S	S	S	S	S	S
W02EC110	Mur_23	water	S	S	S	S	S	S	S	S	S	S	S	S	S	S	S	S	S	S	S	S	S
W03EC007	Mur_23	water	S	S	S	S	S	S	S	S	S	S	S	S	S	S	S	S	S	S	S	S	S
W04EC010	Mur_23	sediment	S	S	S	S	S	S	S	S	S	S	S	S	S	S	S	S	S	S	S	S	S
W04EC031	Mur_23	sediment	S	S	S	S	S	S	S	S	S	S	S	S	S	S	S	S	S	S	S	S	S
W04EC046	Mur_23	sediment	S	S	S	S	S	S	S	S	S	S	S	S	S	S	S	S	S	S	S	S	S
KD01EC051	Mur_24	sediment	S	S	S	S	S	S	S	S	S	S	S	S	S	S	S	S	S	S	S	S	S
KD01EC058	Mur_24	sediment	S	S	S	S	S	S	S	S	S	S	S	S	S	S	S	S	S	S	S	S	S
KD01EC060	Mur_24	sediment	S	S	S	S	S	S	S	S	S	S	S	S	S	S	S	S	S	S	S	S	S
KD01EC070	Mur_24	sediment	S	S	S	S	S	S	S	S	S	S	S	S	S	S	S	S	S	S	S	S	S
KD01EC270	Mur_24	sediment	S	S	S	S	S	S	S	S	S	S	S	S	S	S	S	S	S	S	S	S	S
KD01EC062	Mur_25	sediment	S	S	S	S	S	S	S	S	S	S	S	S	S	S	S	S	S	S	S	S	S
KD01EC222	Mur_25	water	S	S	S	S	S	S	S	S	S	S	S	S	S	S	S	S	S	S	S	S	S
W04EC050	Mur_25	sediment	S	S	S	S	S	S	S	S	S	S	S	S	S	S	S	S	S	S	S	S	S
KD01EC063	Mur_26	sediment	S	S	S	S	S	S	S	S	S	S	S	S	S	S	S	S	S	S	S	S	S
KD01EC131	Mur_26	sediment	S	S	S	S	S	S	S	S	S	S	S	S	S	S	S	S	S	S	S	S	S
W02EC105	Mur_26	water	S	S	S	S	S	S	S	S	S	S	S	S	S	S	S	S	S	S	S	S	S
KD01EC071	Mur_27	sediment	R	R	R	R	S	R	R	S	R	S	R	S	S	S	S	R	S	S	S	R	S
KD01EC095	Mur_27	sediment	S	S	S	S	S	S	S	S	S	S	S	S	S	S	S	S	S	S	S	S	S
KD01EC144	Mur_27	water	S	S	S	S	S	S	S	S	S	S	S	S	S	S	S	S	S	S	S	S	S
KD01EC175	Mur_27	water	S	S	S	S	S	S	S	S	S	S	S	S	S	S	S	S	S	S	S	S	S
KD01EC228	Mur_27	water	S	S	S	S	S	S	S	S	S	S	S	S	S	S	S	S	S	S	S	S	S
KD01EC239	Mur_27	water	S	S	S	S	S	S	S	S	S	S	S	S	S	S	S	S	S	S	S	S	S
KD01EC247	Mur_27	water	S	S	S	S	S	S	S	S	S	S	S	S	S	S	S	S	S	S	S	S	S
KD01EC251	Mur_27	water	S	S	S	S	S	S	S	S	S	S	S	S	S	S	S	S	S	S	S	S	S
KD01EC073	Mur_28	sediment	S	S	S	S	S	S	S	S	S	S	S	S	S	S	S	S	S	S	S	S	S
KD01EC074	Mur_28	sediment	S	S	S	S	S	S	S	S	S	S	S	S	S	S	S	S	S	S	S	S	S
KD01EC081	Mur_28	sediment	S	S	S	S	S	S	S	S	S	S	S	S	S	S	S	S	S	S	S	S	S
KD01EC086	Mur_28	sediment	S	S	S	S	S	S	S	S	S	S	S	S	S	S	S	S	S	S	S	S	S
KD01EC087	Mur_28	sediment	S	S	S	S	S	S	S	S	S	S	S	S	S	S	S	S	S	S	S	S	S
KD01EC088	Mur_28	sediment	S	S	S	S	S	S	S	S	S	S	S	S	S	S	S	S	S	S	S	S	S
KD01EC089	Mur_28	sediment	S	S	S	S	S	S	S	S	S	S	S	S	S	S	S	S	S	S	S	S	S
KD01EC091	Mur_28	sediment	S	S	S	S	S	S	S	S	S	S	S	S	S	S	S	S	S	S	S	S	S
KD01EC092	Mur_28	sediment	S	S	S	S	S	S	S	S	S	S	S	S	S	S	S	S	S	S	S	S	S
KD01EC093	Mur_28	sediment	S	S	S	S	S	S	S	S	S	S	S	S	S	S	S	S	S	S	S	S	S
KD01EC094	Mur_28	sediment	S	S	S	S	S	S	S	S	S	S	S	S	S	S	S	S	S	S	S	S	S
KD01EC075	Mur_29	sediment	S	S	S	S	S	S	S	S	S	S	S	S	S	S	S	S	S	S	S	S	S
KD01EC298	Mur_29	sediment	S	S	S	S	S	S	S	S	S	S	S	S	S	S	S	S	S	S	S	S	S
KD01EC076	Mur_30	sediment	S	S	S	S	S	S	S	S	S	S	S	S	S	S	S	S	S	S	S	S	S
KD01EC303	Mur_30	sediment	R	R	S	S	S	S	S	S	S	S	S	R	S	S	S	S	R	S	S	R	S
KD01EC083	Mur_31	sediment	R	S	S	S	S	S	S	S	S	S	S	S	S	S	S	S	S	S	S	S	S
KD01EC150	Mur_31	water	S	S	S	S	S	S	S	S	S	S	S	S	S	S	S	S	S	S	S	S	S
KD01EC096	Mur_32	sediment	R	S	S	S	S	S	S	S	S	S	S	S	S	S	S	S	R	S	S	R	S
KD01EC288	Mur_32	sediment	S	R	S	S	S	S	S	S	S	S	S	S	S	S	S	S	S	S	S	S	S
KD01EC097	Mur_33	sediment	S	S	S	S	S	S	S	S	S	S	S	S	S	S	S	S	S	S	S	S	S
KD01EC108	Mur_33	sediment	S	S	S	S	S	S	S	S	S	S	S	S	S	S	S	S	S	S	S	S	S
KD01EC098	Mur_34	sediment	S	S	S	S	S	S	S	S	S	S	S	S	S	S	R	R	S	S	S	S	S
KD01EC114	Mur_34	sediment	S	S	S	S	S	S	S	S	S	S	S	S	S	S	S	S	S	S	S	S	S
KD01EC115	Mur_34	sediment	S	S	S	S	S	S	S	S	S	S	S	S	S	S	S	S	S	S	S	S	S
W02EC040	Mur_34	water	S	S	S	S	S	S	S	S	S	S	S	S	S	S	S	S	S	S	S	S	S
W04EC051	Mur_34	sediment	S	S	S	S	S	S	S	S	S	S	S	S	S	S	S	R	S	S	S	S	S
KD01EC102	Mur_35	sediment	S	S	S	S	S	S	S	S	S	S	S	S	S	S	S	S	S	S	S	S	S
KD01EC152	Mur_35	water	R	S	S	S	S	S	S	S	S	S	S	S	S	S	S	S	R	S	S	S	S
KD01EC103	Mur_36	sediment	S	S	S	S	S	S	S	S	S	S	S	S	S	S	S	S	R	S	S	S	S
KD01EC224	Mur_36	water	S	S	S	S	S	S	S	S	S	S	S	S	S	S	S	S	S	S	S	S	S
KD01EC104	Mur_37	sediment	S	S	S	S	S	S	S	S	S	S	S	S	S	S	S	S	S	S	S	S	S
W02EC019	Mur_37	sediment	S	S	S	S	S	S	S	S	S	S	S	S	S	S	S	S	S	S	S	S	S
W02EC022	Mur_37	sediment	S	S	S	S	S	S	S	S	S	S	S	S	S	S	S	S	S	S	S	S	S
W02EC031	Mur_37	sediment	S	S	S	S	S	S	S	S	S	S	S	S	S	S	S	S	S	S	S	S	S
W02EC035	Mur_37	water	S	S	S	S	S	S	S	S	S	S	S	S	S	S	S	S	S	S	S	S	S
W02EC095	Mur_37	water	S	S	S	S	S	S	S	S	S	S	S	S	S	S	S	S	S	S	S	S	S
W03EC005	Mur_37	water	R	R	R	R	R	R	S	S	S	S	S	S	S	S	S	S	S	S	S	S	S
KD01EC105	Mur_38	sediment	S	S	S	S	S	S	S	S	S	S	S	S	S	S	S	S	S	S	S	S	S
KD01EC126	Mur_38	sediment	S	S	S	S	S	S	S	S	S	S	S	S	S	S	S	S	S	S	S	S	S
KD01EC128	Mur_38	sediment	S	S	S	S	S	S	S	S	S	S	S	S	S	S	S	S	S	S	S	S	S
KD01EC169	Mur_38	water	S	S	S	S	S	S	S	S	S	S	S	S	S	S	S	S	S	S	S	S	S
KD01EC234	Mur_38	water	S	S	S	S	S	S	S	S	S	S	S	S	S	S	S	S	S	S	S	S	S
KD01EC257	Mur_38	sediment	S	S	S	S	S	S	S	S	S	S	S	S	S	S	S	S	S	S	S	S	S
KD01EC279	Mur_38	sediment	S	S	S	S	S	S	S	S	S	S	S	S	S	S	S	S	S	S	S	S	S
KD01EC289	Mur_38	sediment	S	S	S	S	S	S	S	S	S	S	S	S	S	S	S	S	S	S	S	S	S
KD01EC107	Mur_39	sediment	S	S	S	S	S	S	S	S	S	S	S	S	S	S	S	S	S	S	S	S	S
KD01EC138	Mur_39	sediment	S	S	S	S	S	S	S	S	S	S	S	S	S	S	S	S	S	S	S	S	S
KD01EC230	Mur_39	water	S	S	S	S	S	S	S	S	S	S	S	S	S	S	S	S	S	S	S	S	S
KD01EC109	Mur_40	sediment	R	S	S	S	S	S	S	S	S	S	S	S	S	S	S	S	S	S	S	R	S
KD01EC261	Mur_40	sediment	S	S	S	S	S	S	S	S	S	S	S	S	S	S	S	S	S	S	S	S	S
KD01EC287	Mur_40	sediment	S	S	S	S	S	S	S	S	S	S	S	S	S	S	S	S	S	S	S	S	S
KD01EC111	Mur_41	sediment	S	S	S	S	S	S	S	S	S	S	S	S	S	S	S	S	S	S	S	S	S
KD01EC172	Mur_41	water	S	S	S	S	S	S	S	S	S	S	S	S	S	S	S	S	S	S	S	S	S
KD01EC112	Mur_42	sediment	R	R	R	R	S	R	S	S	R	S	R	S	S	R	R	R	R	S	S	S	S
KD01EC235	Mur_42	water	S	S	S	S	S	S	S	S	S	S	S	S	S	S	S	S	S	S	S	S	S
KD01EC117	Mur_43	sediment	S	S	S	S	S	S	S	S	S	S	S	S	S	S	S	S	S	S	S	S	S
W02EC106	Mur_43	water	S	S	S	S	S	S	S	S	S	S	S	S	S	S	S	S	R	S	S	S	S
W04EC023	Mur_43	sediment	S	S	S	S	S	S	S	S	S	S	S	S	S	S	S	R	S	S	S	S	S
W04EC047	Mur_43	sediment	S	S	S	S	S	S	S	S	S	S	S	S	S	S	S	R	S	S	S	S	S
W04EC092	Mur_43	sediment	S	S	S	S	S	S	S	S	S	S	S	S	S	S	S	R	S	S	S	S	S
KD01EC124	Mur_44	sediment	S	S	S	S	S	S	S	S	S	S	S	S	S	S	S	S	S	S	S	S	S
KD01EC158	Mur_44	water	S	S	S	S	S	S	S	S	S	S	S	S	S	R	R	R	R	S	S	R	S
KD01EC143	Mur_45	water	S	S	S	S	S	S	S	S	S	S	S	S	S	S	S	S	S	S	S	S	S
W02EC086	Mur_45	water	S	S	S	S	S	S	S	S	S	S	S	S	S	S	S	S	S	S	S	S	S
KD01EC151	Mur_46	water	S	S	S	S	S	S	S	S	S	S	S	S	S	S	S	S	S	S	S	S	S
KD01EC201	Mur_46	water	S	S	S	S	S	S	S	S	S	S	S	S	S	R	R	R	S	S	S	S	S
KD01EC156	Mur_47	water	S	S	S	S	S	S	S	S	S	S	S	S	S	S	S	S	S	S	S	S	S
KD01EC160	Mur_47	water	S	S	S	S	S	S	S	S	S	S	S	S	S	S	S	S	S	S	S	S	S
KD01EC171	Mur_47	water	S	S	S	S	S	S	S	S	S	S	S	S	S	S	S	S	S	S	S	S	S
KD01EC206	Mur_47	water	S	S	S	S	S	S	S	S	S	S	S	S	S	S	S	S	S	S	S	S	S
KD01EC209	Mur_47	water	S	S	S	S	S	S	S	S	S	S	S	S	S	S	S	S	S	S	S	S	S
KD01EC165	Mur_48	water	S	S	S	S	S	S	S	S	S	S	S	S	S	S	S	S	S	S	S	S	S
KD01EC166	Mur_48	water	S	S	S	S	S	S	S	S	S	S	S	S	S	S	S	S	S	S	S	S	S
KD01EC167	Mur_49	water	S	S	S	S	S	S	S	S	S	S	S	S	S	S	S	S	S	S	S	S	S
W03EC014	Mur_49	water	S	S	S	S	S	S	S	S	S	S	S	S	S	S	S	S	S	S	S	S	S
KD01EC181	Mur_50	water	S	S	S	S	S	S	S	S	S	S	S	S	S	S	S	S	R	S	S	S	S
KD01EC282	Mur_50	sediment	S	S	S	S	S	S	S	S	S	S	S	S	S	S	S	S	S	S	S	S	S
KD01EC183	Mur_51	water	R	R	S	S	S	S	S	S	S	S	S	S	S	S	S	S	R	S	S	R	R
KD01EC242	Mur_51	water	R	R	S	S	S	S	S	S	S	S	S	S	S	S	S	S	R	S	S	R	R
KD01EC191	Mur_52	water	S	S	S	S	S	S	S	S	S	S	S	S	S	S	S	S	S	S	S	S	S
KD01EC197	Mur_52	water	S	S	S	S	S	S	S	S	S	S	S	S	S	S	S	S	S	S	S	S	S
KD01EC249	Mur_52	water	S	S	S	S	S	S	S	S	S	S	S	S	S	S	S	S	S	S	S	S	S
KD01EC250	Mur_52	water	S	S	S	S	S	S	S	S	S	S	S	S	S	S	S	S	S	S	S	S	S
KD01EC263	Mur_52	sediment	S	S	S	S	S	S	S	S	S	S	S	S	S	S	S	S	S	S	S	S	S
KD01EC264	Mur_52	sediment	S	S	S	S	S	S	S	S	S	S	S	S	S	S	S	S	S	S	S	S	S
KD01EC268	Mur_52	sediment	R	R	R	S	S	S	S	S	S	S	S	S	S	S	S	S	S	S	S	S	S
KD01EC309	Mur_52	sediment	S	S	S	S	S	S	S	S	S	S	S	S	S	S	S	S	S	S	S	S	S
KD01EC310	Mur_52	sediment	S	S	S	S	S	S	S	S	S	S	S	S	S	S	S	S	S	S	S	S	S
KD01EC195	Mur_53	water	S	S	S	S	S	S	S	S	S	S	S	S	S	S	S	S	S	S	S	S	S
KD01EC198	Mur_53	water	S	S	S	S	S	S	S	S	S	S	S	S	S	S	S	S	S	S	S	S	S
KD01EC202	Mur_53	water	S	S	S	S	S	S	S	S	S	S	S	S	S	S	S	S	S	S	S	S	S
W02EC067	Mur_53	water	S	S	S	S	S	S	S	S	S	S	S	S	S	S	S	S	S	S	S	S	S
W02EC090	Mur_53	water	S	S	S	S	S	S	S	S	S	S	S	S	S	S	S	S	S	S	S	S	S
W03EC017	Mur_53	water	S	S	S	S	S	S	S	S	S	S	S	S	S	S	S	S	S	S	S	S	S
W04EC013	Mur_53	sediment	S	S	S	S	S	S	S	S	S	S	S	S	S	S	S	S	S	S	S	S	S
W04EC014	Mur_53	sediment	S	S	S	S	S	S	S	S	S	S	S	S	S	S	S	S	S	S	S	S	S
W04EC037	Mur_53	sediment	S	S	S	S	S	S	S	S	S	S	S	S	S	S	S	S	S	S	S	S	S
W04EC053	Mur_53	sediment	S	S	S	S	S	S	S	S	S	S	S	S	S	S	S	S	S	S	S	S	S
W04EC058	Mur_53	sediment	S	S	S	S	S	S	S	S	S	S	S	S	S	S	S	S	S	S	S	S	S
W04EC072	Mur_53	sediment	S	S	S	S	S	S	S	S	S	S	S	S	S	S	S	S	S	S	S	S	S
KD01EC211	Mur_54	water	S	S	S	S	S	S	S	S	S	S	S	S	S	S	S	S	S	S	S	S	S
KD01EC271	Mur_54	sediment	S	S	S	S	S	S	S	S	S	S	S	S	S	S	S	S	S	S	S	S	S
KD01EC214	Mur_55	water	R	R	R	R	S	R	R	S	R	S	R	S	S	R	R	R	R	S	S	R	S
W02EC060	Mur_55	water	S	S	S	S	S	S	S	S	S	S	S	S	S	S	S	S	S	S	S	S	S
KD01EC253	Mur_56	water	S	S	S	S	S	S	S	S	S	S	S	S	S	S	S	S	S	S	S	S	S
KD01EC290	Mur_56	sediment	S	S	S	S	S	S	S	S	S	S	S	S	S	S	S	S	S	S	S	S	S
W02EC005	Mur_56	water	S	S	S	S	S	S	S	S	S	S	S	S	S	S	S	S	S	S	S	S	S
W02EC017	Mur_56	water	R	S	S	S	S	S	S	S	S	S	S	S	S	S	S	S	S	S	S	S	S
W02EC101	Mur_56	water	S	S	S	S	S	S	S	S	S	S	S	S	S	S	S	S	S	S	S	S	S
W02EC119	Mur_56	water	R	S	S	S	S	S	S	S	S	S	S	S	S	R	R	R	S	S	S	R	S
W03EC020	Mur_56	water	S	S	S	S	S	S	S	S	S	S	S	S	S	S	S	S	S	S	S	S	S
W04EC095	Mur_56	water	S	S	S	S	S	S	S	S	S	S	S	S	S	S	S	S	S	S	S	S	S
KD01EC283	Mur_57	sediment	S	S	S	S	S	S	S	S	S	S	S	R	S	S	S	R	R	S	S	S	S
W02EC030	Mur_57	sediment	R	S	S	S	S	S	S	S	S	S	S	S	S	S	S	S	S	S	S	S	S
KD01EC295	Mur_58	sediment	S	S	S	S	S	S	S	S	S	S	S	S	S	S	S	S	S	S	S	S	S
KD01EC304	Mur_58	sediment	S	S	S	S	S	S	S	S	S	S	S	S	S	S	S	S	S	S	S	S	S
KD01EC312	Mur_58	sediment	S	S	S	S	S	S	S	S	S	S	S	S	S	S	S	S	S	S	S	S	S
KD01EC299	Mur_59	sediment	S	S	S	S	S	S	S	S	S	S	S	S	S	S	S	S	S	S	S	S	S
KD01EC311	Mur_59	sediment	S	S	S	S	S	S	S	S	S	S	S	S	S	S	S	S	S	S	S	S	S
KD01EC300	Mur_60	sediment	S	S	S	S	S	S	S	S	S	S	S	S	S	S	S	S	S	S	S	S	S
KD01EC301	Mur_60	sediment	S	S	S	S	S	S	S	S	S	S	S	S	S	S	S	S	S	S	S	S	S
KD01EC302	Mur_60	sediment	S	S	S	S	S	S	S	S	S	S	S	S	S	S	S	S	S	S	S	S	S
KD01EC305	Mur_60	sediment	S	S	S	S	S	S	S	S	S	S	S	S	S	S	S	S	S	S	S	S	S
KD01EC306	Mur_60	sediment	S	S	S	S	S	S	S	S	S	S	S	S	S	S	S	S	S	S	S	S	S
KD01EC307	Mur_61	sediment	S	S	S	S	S	S	S	S	S	S	S	S	S	S	S	S	S	S	S	S	S
KD01EC313	Mur_61	sediment	S	S	S	S	S	S	S	S	S	S	S	S	S	S	S	S	S	S	S	S	S
W02EC006	Mur_62	water	S	S	S	S	S	S	S	S	S	S	S	S	S	S	S	S	S	S	S	S	S
W02EC066	Mur_62	water	S	S	S	S	S	S	S	S	S	S	S	S	S	S	S	S	S	S	S	S	S
W02EC088	Mur_62	water	S	S	S	S	S	S	S	S	S	S	S	S	S	S	S	S	S	S	S	S	S
W02EC128	Mur_62	sediment	S	S	S	S	S	S	S	S	S	S	R	S	S	S	S	S	S	S	S	S	S
W02EC132	Mur_62	sediment	S	S	S	S	S	S	S	S	S	S	S	S	S	S	S	S	S	S	S	S	S
W02EC009	Mur_63	water	S	S	S	S	S	S	S	S	S	S	S	S	S	S	S	S	S	S	S	S	S
W02EC016	Mur_63	water	S	S	S	S	S	S	S	S	S	S	S	S	S	S	S	S	S	S	S	S	S
W02EC089	Mur_63	water	S	S	S	S	S	S	S	S	S	S	S	S	S	S	S	S	S	S	S	S	S
W02EC093	Mur_63	water	S	S	S	S	S	S	S	S	S	S	S	S	S	S	S	S	R	S	S	R	S
W02EC094	Mur_63	water	S	S	S	S	S	S	S	S	S	S	S	S	S	S	S	S	S	S	S	S	S
W02EC096	Mur_63	water	S	S	S	S	S	S	S	S	S	S	S	S	S	S	S	S	S	S	S	S	S
W02EC097	Mur_63	water	S	S	S	S	S	S	S	S	S	S	S	S	S	S	S	S	S	S	S	S	S
W02EC099	Mur_63	water	S	S	S	S	S	S	S	S	S	S	S	S	S	S	S	S	S	S	S	S	S
W02EC118	Mur_63	water	S	S	S	S	S	S	S	S	S	S	S	S	S	S	S	S	S	S	S	S	S
W03EC006	Mur_63	water	S	S	S	S	S	S	S	S	S	S	S	S	S	S	S	S	S	S	S	S	S
W03EC008	Mur_63	water	S	S	S	S	S	S	S	S	S	S	S	S	S	S	S	S	S	S	S	S	S
W03EC016	Mur_63	sediment	S	S	S	S	S	S	S	S	S	S	S	S	S	S	S	S	S	S	S	S	S
W03EC022	Mur_63	water	S	S	S	S	S	S	S	S	S	S	S	S	S	S	S	S	S	S	S	S	S
W03EC023	Mur_63	water	S	S	S	S	S	S	S	S	S	S	S	S	S	S	S	S	S	S	S	S	S
W04EC002	Mur_63	sediment	S	S	S	S	S	S	S	S	S	S	S	S	S	S	S	S	S	S	S	S	S
W04EC027	Mur_63	sediment	S	S	S	S	S	S	S	S	S	S	S	S	S	S	S	S	S	S	S	S	S
W04EC034	Mur_63	sediment	S	S	S	S	S	S	S	S	S	S	S	S	S	S	S	S	S	S	S	S	S
W04EC071	Mur_63	sediment	S	S	S	S	S	S	S	S	S	S	S	S	S	S	S	S	S	S	S	S	S
W04EC078	Mur_63	sediment	S	S	S	S	S	S	S	S	S	S	S	S	S	S	S	S	S	S	S	S	S
W02EC010	Mur_64	water	S	S	S	S	S	S	S	S	S	S	S	S	S	S	S	S	S	S	S	S	S
W02EC057	Mur_64	water	S	S	S	S	S	S	S	S	S	S	S	S	S	S	S	S	S	S	S	S	S
W02EC078	Mur_64	water	S	S	S	S	S	S	S	S	S	S	S	S	S	S	S	S	S	S	S	S	S
W04EC055	Mur_64	sediment	S	S	S	S	S	S	S	S	S	S	S	S	S	S	S	R	S	S	S	S	S
W04EC074	Mur_64	sediment	S	S	S	S	S	S	S	S	S	S	S	S	S	S	S	S	S	S	S	S	S
W02EC012	Mur_65	water	S	S	S	S	S	S	S	S	S	S	S	S	S	S	S	S	S	S	S	S	S
W04EC036	Mur_65	sediment	R	S	S	S	S	S	S	S	S	S	S	S	S	S	S	S	R	S	S	R	R
W04EC043	Mur_65	sediment	R	S	S	S	S	S	S	S	S	S	S	S	S	S	S	S	S	S	S	S	S
W02EC020	Mur_66	water	R	S	S	S	S	S	S	S	S	S	S	S	S	S	S	S	S	S	S	S	S
W04EC061	Mur_66	sediment	R	S	S	S	S	S	S	S	S	S	S	S	S	S	S	S	R	S	S	S	S
W04EC080	Mur_66	sediment	S	S	S	S	S	S	S	S	S	S	S	S	S	S	S	S	S	S	S	S	S
W04EC083	Mur_66	sediment	S	S	S	S	S	S	S	S	S	S	S	S	S	S	S	S	S	S	S	S	S
W02EC029	Mur_67	water	S	S	S	S	S	S	S	S	S	S	S	S	S	S	S	S	S	S	S	S	S
W02EC037	Mur_67	water	S	S	S	S	S	S	S	S	S	S	S	S	S	S	S	S	S	S	S	S	S
W02EC050	Mur_67	water	S	S	S	S	S	S	S	S	S	S	S	S	S	S	S	S	S	S	S	S	S
W02EC084	Mur_67	water	S	S	S	S	S	S	S	S	S	S	S	S	S	S	S	S	S	S	S	S	S
W02EC033	Mur_68	water	S	S	S	S	S	S	S	S	S	S	S	S	S	S	S	S	S	S	S	S	S
W02EC047	Mur_68	water	R	S	S	S	S	S	S	S	S	S	S	S	S	S	S	S	R	S	S	R	S
W02EC048	Mur_68	water	R	S	S	S	S	S	S	S	S	S	S	S	S	S	S	S	R	S	S	R	S
W02EC121	Mur_68	water	R	S	S	S	S	S	S	S	S	S	S	S	S	S	R	S	R	S	S	R	S
W02EC130	Mur_68	sediment	S	S	S	S	S	S	S	S	S	S	R	S	S	S	S	R	S	S	S	S	S
W03EC030	Mur_68	water	S	S	S	S	S	S	S	S	S	S	S	S	S	S	S	S	S	S	S	S	S
W04EC025	Mur_68	sediment	R	S	S	S	S	S	S	S	S	S	S	S	S	S	S	S	S	S	S	S	S
W04EC064	Mur_68	sediment	S	S	S	S	S	S	S	S	S	S	S	S	S	S	S	S	S	S	S	S	S
W02EC036	Mur_69	water	R	R	R	R	R	R	R	S	R	S	S	S	S	S	S	S	S	S	S	S	S
W02EC072	Mur_69	water	R	S	S	S	S	S	S	S	S	S	S	S	S	S	S	R	R	S	S	R	S
W02EC038	Mur_70	water	S	S	S	S	S	S	S	S	S	S	S	S	S	S	S	S	S	S	S	S	S
W02EC087	Mur_70	water	S	S	S	S	S	S	S	S	S	S	S	S	S	S	S	S	S	S	S	S	S
W02EC043	Mur_71	water	S	S	S	S	S	S	S	S	S	S	S	S	S	S	S	S	S	S	S	S	S
W02EC049	Mur_71	water	S	S	S	S	S	S	S	S	S	S	S	S	S	S	S	S	S	S	S	S	S
W02EC054	Mur_71	water	S	S	S	S	S	S	S	S	S	S	S	S	S	S	S	S	S	S	S	S	S
W02EC059	Mur_71	water	S	S	S	S	S	S	S	S	S	S	S	S	S	S	S	S	S	S	S	S	S
W02EC062	Mur_71	water	S	S	S	S	S	S	S	S	S	S	S	S	S	S	S	S	S	S	S	S	S
W02EC074	Mur_71	water	S	S	S	S	S	S	S	S	S	S	S	S	S	S	S	S	S	S	S	S	S
W02EC082	Mur_71	water	S	S	S	S	S	S	S	S	S	S	S	S	S	S	S	S	S	S	S	S	S
W02EC083	Mur_71	water	S	S	S	S	S	S	S	S	S	S	S	S	S	S	S	S	S	S	S	S	S
W02EC085	Mur_71	water	S	S	S	S	S	S	S	S	S	S	S	S	S	S	S	S	S	S	S	S	S
W02EC091	Mur_71	water	S	S	S	S	S	S	S	S	S	S	S	S	S	S	S	S	S	S	S	S	S
W04EC009	Mur_71	sediment	S	S	S	S	S	S	S	S	S	S	S	S	S	S	S	S	S	S	S	S	S
W02EC046	Mur_72	water	S	S	S	S	S	S	S	S	S	S	S	S	S	S	S	S	S	S	S	S	S
W02EC073	Mur_72	water	S	S	S	S	S	S	S	S	S	S	S	S	S	S	S	S	S	S	S	S	S
W03EC013	Mur_72	water	S	S	S	S	S	S	S	S	S	S	S	S	S	S	S	S	S	S	S	S	S
W04EC003	Mur_72	sediment	S	S	S	S	S	S	S	S	S	S	S	S	S	S	S	S	S	S	S	S	S
W04EC086	Mur_72	sediment	S	S	S	S	S	S	S	S	S	S	S	S	S	S	S	S	S	S	S	S	S
W02EC053	Mur_73	water	R	S	S	S	S	S	S	S	S	S	S	S	S	S	S	R	S	S	S	S	R
W02EC114	Mur_73	water	S	S	S	S	S	S	S	S	S	S	S	S	S	S	S	S	S	S	S	S	S
W02EC115	Mur_73	water	R	S	S	S	S	S	S	S	S	S	S	S	S	S	S	S	S	S	S	R	S
W03EC015	Mur_73	water	S	S	S	S	S	S	S	S	S	S	S	S	S	S	S	S	S	S	S	S	S
W02EC055	Mur_74	water	S	S	S	S	S	S	S	S	S	S	S	S	S	S	S	S	S	S	S	S	S
W02EC080	Mur_74	water	S	S	S	S	S	S	S	S	S	S	S	S	S	S	S	S	S	S	S	S	S
W04EC096	Mur_74	water	S	S	S	S	S	S	S	S	S	S	S	S	S	S	S	S	S	S	S	S	S
W02EC063	Mur_75	water	S	S	S	S	S	S	S	S	S	S	S	S	S	S	S	S	S	S	S	S	S
W03EC004	Mur_75	sediment	S	S	S	S	S	S	S	S	S	S	S	S	S	S	R	R	S	S	S	S	S
W04EC001	Mur_75	sediment	R	S	S	S	S	S	S	S	S	S	S	S	S	S	S	R	S	S	S	S	S
W04EC006	Mur_75	sediment	S	S	S	S	S	S	S	S	S	S	S	S	S	R	S	R	S	S	S	S	S
W04EC007	Mur_75	sediment	S	S	S	S	S	S	S	S	S	S	S	S	S	S	S	R	S	S	S	S	S
W04EC067	Mur_75	sediment	S	S	S	S	S	S	S	S	S	S	S	S	S	R	S	R	S	S	S	S	S
W04EC077	Mur_75	sediment	S	S	S	S	S	S	S	S	S	S	S	S	S	S	S	R	S	S	S	S	S
W04EC085	Mur_75	sediment	S	S	S	S	S	S	S	S	S	S	S	S	S	S	S	R	S	S	S	S	S
W02EC068	Mur_76	water	S	S	S	S	S	S	S	S	S	S	S	S	S	R	R	R	S	S	S	S	S
W03EC028	Mur_76	sediment	S	S	S	S	S	S	S	S	S	S	S	S	S	S	S	S	S	S	S	S	S
W02EC077	Mur_77	water	S	S	S	S	S	S	S	S	S	S	S	S	S	S	S	S	S	S	S	S	S
W03EC018	Mur_77	water	S	S	S	S	S	S	S	S	S	S	S	S	S	S	S	S	S	S	S	S	S
W04EC087	Mur_77	water	S	S	S	R	S	S	S	S	S	S	S	S	S	S	S	S	S	S	S	S	S
W04EC089	Mur_77	water	S	S	S	S	S	S	S	S	S	S	S	S	S	R	R	S	S	S	S	S	S
W02EC079	Mur_78	water	S	S	S	S	S	S	S	S	S	S	S	S	S	S	S	S	S	S	S	S	S
W03EC021	Mur_78	sediment	S	S	S	S	S	S	S	S	S	S	S	S	S	S	S	S	S	S	S	S	S
W02EC098	Mur_79	water	S	S	S	S	S	S	S	S	S	S	S	S	S	S	S	S	S	S	S	S	S
W02EC131	Mur_79	sediment	S	S	S	S	S	S	S	S	S	S	S	S	S	S	S	S	S	S	S	S	S
W04EC033	Mur_79	sediment	S	S	S	S	S	S	S	S	S	S	S	S	S	S	S	S	S	S	S	S	S
W02EC100	Mur_80	water	S	S	S	S	S	S	S	S	S	S	S	S	S	S	S	S	S	S	S	S	S
W03EC029	Mur_80	water	S	S	S	S	S	S	S	S	S	S	S	S	S	S	S	S	S	S	S	S	S
W04EC044	Mur_80	sediment	S	S	S	S	S	S	S	S	S	S	S	S	S	S	S	S	S	S	S	S	S
W04EC045	Mur_80	sediment	S	S	S	S	S	S	S	S	S	S	S	S	S	S	S	S	S	S	S	S	S
W02EC108	Mur_81	water	S	S	S	S	S	S	S	S	S	S	S	S	S	S	S	R	S	S	S	S	S
W02EC117	Mur_81	water	S	S	S	S	S	S	S	S	S	S	S	S	S	S	S	R	S	S	S	S	S
W02EC124	Mur_81	water	S	S	S	S	S	S	S	S	S	S	S	S	S	S	S	R	S	S	S	S	S
W03EC010	Mur_82	water	S	S	S	S	S	S	S	S	S	S	S	S	S	S	S	S	S	S	S	S	S
W03EC031	Mur_82	water	R	S	S	S	S	S	S	S	S	S	S	S	S	S	S	S	S	S	S	S	S
W04EC094	Mur_82	water	S	S	S	S	S	S	S	S	S	S	S	S	S	S	S	S	S	S	S	S	S
W03EC011	Mur_83	water	S	S	S	S	S	S	S	S	S	S	S	S	S	R	S	R	S	S	S	S	S
W04EC011	Mur_83	sediment	S	S	S	S	S	S	S	S	S	S	S	S	S	S	S	S	S	S	S	S	S
W04EC063	Mur_83	sediment	S	S	S	S	S	S	S	S	S	S	S	S	S	S	S	S	S	S	S	S	S
W03EC033	Mur_84	water	S	S	S	S	S	S	S	S	S	S	S	S	S	S	S	R	S	S	S	S	S
W04EC024	Mur_84	sediment	S	S	S	S	S	S	S	S	S	S	S	S	S	S	S	R	S	S	S	S	S
W04EC028	Mur_84	sediment	S	S	S	S	S	S	S	S	S	S	S	S	S	S	S	S	S	S	S	S	S
W04EC048	Mur_84	sediment	S	S	S	S	S	S	S	S	S	S	S	S	S	S	S	R	S	S	S	S	S
W04EC054	Mur_84	sediment	S	S	S	S	S	S	S	S	S	S	S	S	S	S	S	R	S	S	S	S	S
W04EC056	Mur_84	sediment	S	S	S	S	S	S	S	S	S	S	S	S	S	R	R	R	S	S	S	S	S
W04EC065	Mur_84	sediment	S	S	S	S	S	S	S	S	S	S	S	S	S	S	R	R	S	S	S	S	S
W04EC066	Mur_84	sediment	S	S	S	S	S	S	S	S	S	S	S	S	S	S	S	R	S	S	S	S	S
W04EC073	Mur_84	sediment	S	S	S	S	S	S	S	S	S	S	S	S	S	S	S	R	S	S	S	S	S
W04EC005	Mur_85	sediment	S	S	S	S	S	S	S	S	S	S	S	S	S	S	S	S	S	S	S	S	S
W04EC059	Mur_85	sediment	S	S	S	S	S	S	S	S	S	S	S	S	S	S	S	S	S	S	S	S	S
W04EC084	Mur_85	sediment	R	S	S	S	S	S	S	S	S	S	S	S	S	S	S	S	S	S	S	S	S
W04EC008	Mur_86	sediment	S	S	S	S	S	S	S	S	S	S	S	S	S	S	S	S	S	S	S	S	S
W04EC012	Mur_86	sediment	S	S	S	S	S	S	S	S	S	S	S	S	S	S	S	S	S	S	S	S	S
W04EC068	Mur_86	sediment	S	S	S	S	S	S	S	S	S	S	S	S	S	S	S	S	S	S	S	S	S
W04EC081	Mur_86	sediment	S	S	S	S	S	S	S	S	S	S	S	S	S	S	S	S	S	S	S	S	R
W04EC021	Mur_87	sediment	S	S	S	S	S	S	S	S	S	S	S	S	S	S	S	S	S	S	S	S	S
W04EC032	Mur_87	sediment	S	S	S	S	S	S	S	S	S	S	S	S	S	S	S	S	S	S	S	S	S
KD01EC002	Mur_Si	sediment	S	S	S	S	S	S	S	S	S	S	S	S	S	S	S	S	S	S	S	S	S
KD01EC003	Mur_Si	sediment	S	S	S	S	S	S	S	S	S	S	S	S	S	S	S	S	S	S	S	S	S
KD01EC004	Mur_Si	sediment	S	S	S	S	S	S	S	S	S	S	S	S	S	S	S	S	S	S	S	S	S
KD01EC005	Mur_Si	sediment	S	S	S	S	S	S	S	S	S	S	S	S	S	S	S	S	S	S	S	S	S
KD01EC006	Mur_Si	sediment	R	R	R	R	S	R	S	S	S	S	R	S	S	R	R	R	S	S	S	R	S
KD01EC007	Mur_Si	sediment	S	S	S	S	S	S	S	S	S	S	S	S	S	S	S	S	S	S	S	S	S
KD01EC009	Mur_Si	sediment	S	S	S	S	S	S	S	S	S	S	S	S	S	S	S	S	S	S	S	S	S
KD01EC010	Mur_Si	sediment	S	S	S	S	S	S	S	S	S	S	S	S	S	S	S	S	S	S	S	S	S
KD01EC011	Mur_Si	sediment	S	S	S	S	S	S	S	S	S	S	S	S	S	S	S	S	S	S	S	S	S
KD01EC012	Mur_Si	sediment	S	S	S	S	S	S	S	S	S	S	S	S	S	S	S	S	R	S	S	S	S
KD01EC013	Mur_Si	sediment	S	S	S	S	S	S	S	S	S	S	S	S	S	S	S	S	S	S	S	S	S
KD01EC014	Mur_Si	sediment	S	S	S	S	S	S	S	S	S	S	S	S	S	S	S	S	S	S	S	S	S
KD01EC015	Mur_Si	sediment	S	S	S	S	S	S	S	S	S	S	S	S	S	S	S	S	S	S	S	S	S
KD01EC016	Mur_Si	sediment	S	S	S	S	S	S	S	S	S	S	S	S	S	S	R	R	S	S	S	S	S
KD01EC017	Mur_Si	sediment	S	S	S	S	S	S	S	S	S	S	S	S	S	S	S	S	S	S	S	S	S
KD01EC018	Mur_Si	sediment	S	S	S	S	S	S	S	S	S	S	S	S	S	S	S	S	S	S	S	S	S
KD01EC019	Mur_Si	sediment	S	S	S	S	S	S	S	S	S	S	S	S	S	S	S	S	S	S	S	S	S
KD01EC034	Mur_Si	sediment	R	S	S	S	S	S	S	S	S	S	S	S	S	S	S	S	S	S	S	S	S
KD01EC042	Mur_Si	sediment	S	S	S	S	S	S	S	S	S	S	S	S	S	S	S	S	S	S	S	S	S
KD01EC047	Mur_Si	sediment	R	S	S	S	S	S	S	S	S	S	S	S	S	R	R	R	S	S	S	S	S
KD01EC050	Mur_Si	sediment	S	S	S	S	S	S	S	S	S	S	S	S	S	S	S	S	S	S	S	S	S
KD01EC052	Mur_Si	sediment	S	S	S	S	S	S	S	S	S	S	S	S	S	S	S	S	S	S	S	S	S
KD01EC055	Mur_Si	sediment	S	S	S	S	S	S	S	S	S	S	S	S	S	S	S	S	S	S	S	S	S
KD01EC059	Mur_Si	sediment	S	S	S	S	S	S	S	S	S	S	S	S	S	S	S	S	S	S	S	S	S
KD01EC061	Mur_Si	sediment	S	S	S	S	S	S	S	S	S	S	S	S	S	S	S	S	S	S	S	S	S
KD01EC064	Mur_Si	sediment	S	S	S	S	S	S	S	S	S	S	S	S	S	S	S	S	S	S	S	S	S
KD01EC068	Mur_Si	sediment	S	S	S	S	S	S	S	S	S	S	S	S	S	S	S	S	S	S	S	S	S
KD01EC077	Mur_Si	sediment	R	S	S	S	S	S	S	S	S	S	S	S	S	S	S	S	R	S	S	R	S
KD01EC079	Mur_Si	sediment	S	S	S	S	S	S	S	S	S	S	S	S	S	S	S	S	S	S	S	S	S
KD01EC084	Mur_Si	sediment	S	S	S	S	S	S	S	S	S	S	S	S	S	S	S	S	S	S	S	S	S
KD01EC090	Mur_Si	sediment	R	S	S	S	S	S	S	S	S	S	S	S	S	R	R	R	R	S	S	S	R
KD01EC100	Mur_Si	sediment	S	S	S	S	S	S	S	S	S	S	S	S	S	S	S	S	S	S	S	S	S
KD01EC110	Mur_Si	sediment	R	R	R	R	R	R	R	R	R	S	R	S	S	S	R	R	S	S	S	S	R
KD01EC113	Mur_Si	sediment	S	S	S	S	S	S	S	S	S	S	S	S	S	S	S	S	S	S	S	S	S
KD01EC118	Mur_Si	sediment	S	S	S	S	S	S	S	S	S	S	S	S	S	S	S	S	S	S	S	S	S
KD01EC119	Mur_Si	sediment	S	S	S	S	S	S	S	S	S	S	S	S	S	S	S	S	S	S	S	S	S
KD01EC121	Mur_Si	sediment	S	S	S	S	S	S	S	S	S	S	S	S	S	S	S	S	S	S	S	S	S
KD01EC122	Mur_Si	sediment	S	S	S	S	S	S	S	S	S	S	S	S	S	S	S	S	S	S	S	S	S
KD01EC132	Mur_Si	sediment	S	S	S	S	S	S	S	S	S	S	S	S	S	S	S	S	S	S	S	S	S
KD01EC133	Mur_Si	sediment	S	S	S	S	S	S	S	S	S	S	S	S	S	S	S	R	R	S	S	S	S
KD01EC134	Mur_Si	sediment	S	S	S	S	S	S	S	S	S	S	S	S	S	S	S	S	S	S	S	S	S
KD01EC135	Mur_Si	sediment	R	S	S	S	S	S	S	S	S	S	S	S	S	S	S	S	S	S	S	S	S
KD01EC136	Mur_Si	sediment	R	R	S	S	S	S	S	S	S	S	S	S	S	S	S	S	R	S	S	S	R
KD01EC145	Mur_Si	water	S	S	S	S	S	S	S	S	S	S	S	S	S	R	S	R	S	S	S	S	S
KD01EC147	Mur_Si	water	S	S	S	S	S	S	S	S	S	S	S	S	S	S	S	S	R	S	S	S	S
KD01EC149	Mur_Si	water	S	S	S	S	S	S	S	S	S	S	S	S	S	S	S	S	S	S	S	S	S
KD01EC157	Mur_Si	water	S	S	S	S	S	S	S	S	S	S	S	S	S	S	S	S	S	S	S	S	S
KD01EC159	Mur_Si	water	S	S	S	S	S	S	S	S	S	S	S	S	S	S	S	S	S	S	S	S	S
KD01EC162	Mur_Si	water	S	S	S	S	S	S	S	S	S	S	S	S	S	S	S	S	S	S	S	S	S
KD01EC170	Mur_Si	water	S	S	S	S	S	S	S	S	S	S	R	S	S	S	S	S	S	S	S	S	S
KD01EC173	Mur_Si	water	S	S	S	S	S	S	S	S	S	S	S	S	S	S	S	S	S	S	S	S	S
KD01EC176	Mur_Si	water	S	S	S	S	S	S	S	S	S	S	S	S	S	S	S	S	S	S	S	S	S
KD01EC177	Mur_Si	water	S	S	S	S	S	S	S	S	S	S	S	S	S	S	S	S	R	S	S	S	S
KD01EC184	Mur_Si	water	S	S	S	S	S	S	S	S	S	S	S	S	S	S	S	S	S	S	S	S	S
KD01EC188	Mur_Si	water	S	S	S	S	S	S	S	S	S	S	S	S	S	R	R	R	R	S	S	R	S
KD01EC189	Mur_Si	water	R	S	S	S	S	S	S	S	S	S	S	S	S	R	R	R	R	S	S	S	R
KD01EC190	Mur_Si	water	S	S	S	S	S	S	S	S	S	S	S	S	S	S	S	S	S	S	S	S	S
KD01EC192	Mur_Si	water	S	S	S	S	S	S	S	S	S	S	S	S	S	S	S	S	S	S	S	S	S
KD01EC193	Mur_Si	water	S	S	S	S	S	S	S	S	S	S	S	S	S	S	S	S	S	S	S	S	S
KD01EC200	Mur_Si	water	S	S	S	S	S	S	S	S	S	S	S	S	S	S	S	S	S	S	S	S	S
KD01EC205	Mur_Si	water	S	S	S	S	S	S	S	S	S	S	S	S	S	S	S	S	S	S	S	S	S
KD01EC207	Mur_Si	water	S	S	S	S	S	S	S	S	S	S	S	S	S	S	S	S	S	S	S	S	S
KD01EC216	Mur_Si	water	S	S	S	S	S	S	S	S	S	S	S	S	S	S	S	S	S	S	S	S	S
KD01EC217	Mur_Si	water	S	S	S	S	S	S	S	S	S	S	S	S	S	S	S	S	S	S	S	S	S
KD01EC219	Mur_Si	water	R	R	R	S	S	S	S	S	S	S	S	S	S	S	S	S	S	S	S	S	S
KD01EC220	Mur_Si	water	S	S	S	S	S	S	S	S	S	S	S	S	S	S	S	S	S	S	S	S	S
KD01EC221	Mur_Si	water	S	S	S	S	S	S	S	S	S	S	S	S	S	S	S	S	S	S	S	S	S
KD01EC223	Mur_Si	water	S	S	S	S	S	S	S	S	S	S	S	S	S	R	R	R	S	S	S	R	S
KD01EC225	Mur_Si	water	S	S	S	S	S	S	S	S	S	S	S	S	S	S	S	S	S	S	S	S	S
KD01EC229	Mur_Si	water	S	S	S	S	S	S	S	S	S	S	S	S	S	S	S	S	S	S	S	S	S
KD01EC233	Mur_Si	water	S	S	S	S	S	S	S	S	S	S	S	S	S	S	S	S	S	S	S	S	S
KD01EC236	Mur_Si	water	S	S	S	S	S	S	S	S	S	S	S	S	S	R	R	R	S	S	S	S	S
KD01EC240	Mur_Si	water	S	S	S	S	S	S	S	S	S	S	S	S	S	S	S	S	S	S	S	S	S
KD01EC241	Mur_Si	water	S	S	S	S	S	S	S	S	S	S	S	S	S	S	S	S	S	S	S	S	S
KD01EC244	Mur_Si	water	S	S	S	S	S	S	S	S	S	S	S	S	S	S	S	S	S	S	S	S	S
KD01EC245	Mur_Si	water	S	S	S	S	S	S	S	S	S	S	S	S	S	S	S	S	S	S	S	S	S
KD01EC246	Mur_Si	water	S	S	S	S	S	S	S	S	S	S	S	S	S	S	S	S	S	S	S	S	S
KD01EC254	Mur_Si	water	S	S	S	S	S	S	S	S	S	S	S	S	S	S	S	S	S	S	S	S	S
KD01EC256	Mur_Si	sediment	S	S	S	S	S	S	S	S	S	S	S	S	S	S	S	S	S	S	S	S	S
KD01EC262	Mur_Si	sediment	S	S	S	S	S	S	S	S	S	S	S	S	S	S	S	S	S	S	S	S	S
KD01EC267	Mur_Si	sediment	S	S	S	S	S	S	S	S	S	S	S	S	S	S	S	S	S	S	S	S	S
KD01EC274	Mur_Si	sediment	S	S	S	S	S	S	S	S	S	S	S	S	S	S	S	S	S	S	S	S	S
KD01EC276	Mur_Si	sediment	R	R	S	S	S	S	S	S	S	S	S	S	S	R	R	R	R	S	S	R	S
KD01EC285	Mur_Si	sediment	S	S	S	S	S	S	S	S	S	S	S	S	S	S	S	S	S	S	S	S	S
KD01EC291	Mur_Si	sediment	S	S	S	S	S	S	S	S	S	S	S	S	S	S	S	S	S	S	S	S	S
KD01EC292	Mur_Si	sediment	S	S	S	S	S	S	S	S	S	S	S	S	S	S	S	S	S	S	S	S	S
KD01EC293	Mur_Si	sediment	S	S	S	S	S	S	S	S	S	S	S	S	S	R	R	R	R	S	S	S	S
KD01EC296	Mur_Si	sediment	R	R	S	S	S	S	R	S	S	S	S	S	S	S	S	S	S	S	S	R	S
KD01EC308	Mur_Si	sediment	S	S	S	S	S	S	S	S	S	S	S	S	S	S	S	S	S	S	S	S	S
KD01EC314	Mur_Si	sediment	S	S	S	S	S	S	S	S	S	S	S	S	S	S	S	S	S	S	S	S	S
W02EC001	Mur_Si	water	S	S	S	S	S	S	S	S	S	S	S	S	S	S	S	S	S	S	S	S	S
W02EC003	Mur_Si	water	R	R	S	S	S	S	R	S	S	S	S	S	S	S	S	S	S	S	S	S	S
W02EC007	Mur_Si	water	S	S	S	S	S	S	S	S	S	S	S	S	S	S	S	S	S	S	S	S	S
W02EC013	Mur_Si	water	S	S	S	S	S	S	S	S	S	S	S	S	S	S	S	S	S	S	S	S	S
W02EC015	Mur_Si	water	S	S	S	S	S	S	S	S	S	S	S	S	S	S	S	R	S	S	S	S	S
W02EC024	Mur_Si	sediment	S	S	S	S	S	S	S	S	S	S	S	S	S	S	S	S	S	S	S	S	S
W02EC025	Mur_Si	sediment	S	S	S	S	S	S	S	S	S	S	S	S	S	S	S	S	S	S	S	S	S
W02EC026	Mur_Si	sediment	S	S	S	S	S	S	S	S	S	S	S	S	S	S	R	S	S	S	S	S	S
W02EC027	Mur_Si	sediment	S	S	S	S	S	S	S	S	S	S	S	S	S	S	S	S	S	S	S	S	S
W02EC028	Mur_Si	sediment	S	S	S	S	S	S	S	S	S	S	S	S	S	S	S	R	R	S	S	S	S
W02EC032	Mur_Si	sediment	S	S	S	S	S	S	S	S	S	S	S	S	S	S	S	S	S	S	S	S	S
W02EC045	Mur_Si	water	S	S	S	S	S	S	S	S	S	S	S	S	S	S	S	S	S	S	S	S	S
W02EC052	Mur_Si	water	S	S	S	S	S	S	S	S	S	S	S	S	S	S	S	R	S	S	S	S	S
W02EC056	Mur_Si	water	S	S	S	S	S	S	S	S	S	S	S	R	S	S	S	S	S	S	S	S	S
W02EC058	Mur_Si	water	S	S	S	S	S	S	S	S	S	S	S	S	S	S	S	S	S	S	S	S	S
W02EC061	Mur_Si	water	S	S	S	S	S	S	S	S	S	S	S	S	S	S	S	S	S	S	S	S	S
W02EC070	Mur_Si	water	S	S	S	S	S	S	S	S	S	S	S	S	S	S	S	S	S	S	S	S	S
W02EC076	Mur_Si	water	S	S	S	S	S	S	S	S	S	S	S	S	S	S	S	S	S	S	S	S	S
W02EC103	Mur_Si	water	S	S	S	S	S	S	S	S	S	S	S	S	S	S	S	S	S	S	S	S	S
W02EC104	Mur_Si	water	S	S	S	S	S	S	S	S	S	S	S	S	S	S	S	S	S	S	S	S	S
W02EC107	Mur_Si	water	S	S	S	S	S	S	S	S	S	S	S	S	S	S	S	S	S	S	S	S	S
W02EC111	Mur_Si	water	S	S	S	S	S	S	S	S	S	S	S	S	S	S	S	S	S	S	S	S	S
W02EC112	Mur_Si	water	S	S	S	S	S	S	S	S	S	S	S	S	S	S	S	S	S	S	S	S	S
W02EC113	Mur_Si	water	R	R	R	S	S	S	S	S	S	S	S	S	S	S	S	S	S	S	S	S	S
W02EC122	Mur_Si	water	S	S	S	S	S	S	S	S	S	S	S	S	S	S	S	S	S	S	S	S	S
W02EC126	Mur_Si	water	S	S	S	S	S	S	S	S	S	S	R	S	S	S	S	S	S	S	S	S	S
W02EC127	Mur_Si	sediment	S	S	S	S	S	S	S	S	S	S	S	S	S	S	S	S	S	S	S	S	S
W03EC001	Mur_Si	water	S	S	S	S	S	S	S	S	S	S	S	S	S	S	S	S	S	S	S	S	S
W03EC003	Mur_Si	water	R	S	S	S	S	S	S	S	S	S	S	S	S	S	S	R	S	S	S	S	S
W03EC009	Mur_Si	water	R	R	S	S	S	S	S	S	S	S	S	S	S	S	S	S	R	S	S	S	S
W03EC032	Mur_Si	water	S	S	S	S	S	S	S	S	S	S	S	S	S	S	S	S	S	S	S	S	S
W04EC004	Mur_Si	sediment	S	S	S	S	S	S	S	S	S	S	S	S	S	S	S	S	S	S	S	S	S
W04EC020	Mur_Si	sediment	S	S	S	S	S	S	S	S	S	S	S	S	S	S	S	S	S	S	S	S	S
W04EC030	Mur_Si	sediment	S	S	S	S	S	S	S	S	S	S	S	S	S	S	S	S	S	S	S	S	S
W04EC035	Mur_Si	sediment	S	S	S	S	S	S	S	S	S	S	S	S	S	R	R	R	R	S	S	R	S
W04EC038	Mur_Si	sediment	S	S	S	S	S	S	S	S	S	S	S	S	S	S	S	S	S	S	S	S	S
W04EC042	Mur_Si	sediment	R	S	S	S	S	S	S	S	S	S	S	S	S	R	R	R	R	S	S	R	S
W04EC049	Mur_Si	sediment	S	S	S	S	S	S	S	S	S	S	S	S	S	S	S	S	S	S	S	S	S
W04EC052	Mur_Si	sediment	S	S	S	S	S	S	S	S	S	S	S	S	S	S	S	S	S	S	S	S	S
W04EC057	Mur_Si	sediment	R	S	R	R	S	R	S	S	R	S	R	S	S	S	S	S	R	S	S	S	S
W04EC060	Mur_Si	sediment	S	S	S	S	S	S	S	S	S	S	S	S	S	S	S	R	R	S	S	S	S
W04EC062	Mur_Si	sediment	S	S	S	S	S	S	S	S	S	S	S	S	S	S	S	S	S	S	S	S	S
W04EC070	Mur_Si	sediment	S	S	S	S	S	S	S	S	S	S	S	S	S	S	S	S	S	S	S	S	S
W04EC076	Mur_Si	sediment	R	S	S	S	S	S	S	S	S	S	S	S	S	S	S	S	S	S	S	S	S
W04EC079	Mur_Si	sediment	R	S	S	R	R	S	S	S	S	S	S	S	S	S	S	R	S	S	S	S	S
W04EC082	Mur_Si	sediment	S	S	S	S	S	S	S	S	S	S	S	S	S	S	S	S	S	S	S	S	S
W04EC091	Mur_Si	water	R	S	S	S	S	S	S	S	S	S	S	S	S	S	S	S	S	S	S	R	S
DK01EC001	Drava_1	water	S	S	S	S	S	S	S	S	S	S	S	S	S	S	S	R	S	S	S	R	S
DK01EC005	Drava_1	sediment	S	S	S	S	S	S	S	S	S	S	S	S	S	S	S	S	S	S	S	S	S
DK01EC027	Drava_1	water	R	R	S	S	S	S	S	S	S	S	S	S	S	R	R	R	R	S	S	S	R
DK01EC066	Drava_1	water	S	S	S	S	S	S	S	S	S	S	S	S	S	S	S	S	S	S	S	R	S
DK01EC083	Drava_1	water	S	S	S	S	S	S	S	S	S	S	S	S	S	S	S	R	S	S	S	S	S
DR01EC085	Drava_1	water	S	S	S	S	S	S	S	S	S	S	S	S	S	S	S	S	S	S	S	S	S
DR01EC156	Drava_1	sediment	S	S	S	S	S	S	S	S	S	S	S	S	S	S	S	S	S	S	S	S	S
DK01EC002	Drava_2	water	S	S	S	S	S	S	S	S	S	S	S	S	S	S	S	S	S	S	S	S	S
DK01EC056	Drava_2	water	S	S	S	S	S	S	S	S	S	S	S	S	S	S	S	S	S	S	S	S	S
DK01EC059	Drava_2	water	R	S	S	S	S	S	S	S	S	S	S	S	S	S	S	S	S	S	S	S	S
DK01EC093	Drava_2	water	S	S	S	S	S	S	S	S	S	S	S	S	S	S	S	S	S	S	S	S	S
DK01EC096	Drava_2	water	S	S	S	S	S	S	S	S	S	S	S	S	S	S	S	S	S	S	S	S	S
DR01EC009	Drava_2	water	S	S	S	S	S	S	S	S	S	S	S	S	S	S	S	S	S	S	S	S	S
DR01EC091	Drava_2	water	S	S	S	S	S	S	S	S	S	S	S	S	S	S	S	S	S	S	S	S	S
DR01EC131	Drava_2	sediment	S	S	S	S	S	S	S	S	S	S	S	S	S	S	S	S	S	S	S	S	S
DR01EC158	Drava_2	sediment	S	R	S	S	S	S	S	S	S	S	S	S	S	S	S	S	S	S	S	S	S
DR01EC163	Drava_2	sediment	S	S	S	S	S	S	S	S	S	S	S	S	S	S	S	S	S	S	S	S	S
DK01EC006	Drava_3	sediment	S	S	S	S	S	S	S	S	S	S	S	S	S	S	S	S	S	S	S	S	S
DK01EC012	Drava_3	water	S	S	S	S	S	S	S	S	S	S	S	S	S	S	S	S	S	S	S	S	S
DK01EC078	Drava_3	water	S	S	S	S	S	S	S	S	S	S	S	S	S	S	S	S	S	S	S	S	S
DK01EC094	Drava_3	water	S	S	S	S	S	S	S	S	S	S	S	S	S	S	S	S	S	S	S	S	S
DK01EC101	Drava_3	water	S	S	S	S	S	S	S	S	S	S	S	S	S	S	S	S	S	S	S	S	S
DK01EC107	Drava_3	water	R	S	S	S	S	S	S	S	S	S	S	S	S	S	S	R	S	S	S	R	S
DK01EC150	Drava_3	sediment	S	S	S	S	S	S	S	S	S	S	S	S	S	S	S	S	S	S	S	S	S
DR01EC018	Drava_3	water	S	S	S	S	S	S	S	S	S	S	S	S	S	S	S	S	S	S	S	S	S
DK01EC007	Drava_4	sediment	S	S	S	S	S	S	S	S	S	S	S	S	S	S	S	S	S	S	S	S	S
DK01EC008	Drava_4	sediment	S	S	S	S	S	S	S	S	S	S	S	S	S	S	S	S	S	S	S	S	S
DK01EC052	Drava_4	water	S	S	S	S	S	S	S	S	S	S	S	S	S	S	S	S	S	S	S	S	S
DK01EC146	Drava_4	sediment	S	S	S	S	S	S	S	S	S	S	S	S	S	S	S	S	S	S	S	S	S
DK01EC009	Drava_5	sediment	R	R	S	S	S	S	R	S	S	S	S	S	S	S	S	S	S	S	S	S	S
DK01EC010	Drava_5	sediment	R	R	S	S	S	S	R	S	S	S	S	S	S	S	S	S	S	S	S	S	S
DK01EC053	Drava_5	water	S	S	S	S	S	S	S	S	S	S	S	S	S	S	S	S	S	S	S	S	S
DR01EC126	Drava_5	sediment	S	S	S	S	S	S	S	S	S	S	S	S	S	S	S	S	S	S	S	S	S
DR01EC151	Drava_5	sediment	R	R	S	S	S	S	S	S	S	S	S	S	S	S	S	S	S	S	S	S	S
DK01EC014	Drava_6	water	S	S	S	S	S	S	S	S	S	S	S	S	S	S	S	S	S	S	S	S	S
DK01EC015	Drava_6	water	S	S	S	S	S	S	S	S	S	S	S	S	S	S	S	S	S	S	S	S	S
DK01EC016	Drava_7	water	R	R	R	S	S	S	S	S	S	S	S	S	S	S	R	R	R	S	S	R	S
DR01EC025	Drava_7	water	S	S	S	S	S	S	S	S	S	S	S	S	S	S	S	S	S	S	S	S	S
DR01EC038	Drava_7	water	S	S	S	S	S	S	S	S	S	S	S	S	S	S	S	S	S	S	S	S	S
DR01EC166	Drava_7	sediment	R	S	S	S	S	S	S	S	S	S	S	S	S	R	R	S	R	S	S	S	R
DK01EC017	Drava_8	water	S	S	S	S	S	S	S	S	S	S	S	S	S	S	S	S	S	S	S	S	S
DK01EC029	Drava_8	water	S	S	S	S	S	S	S	S	S	S	S	S	S	S	S	S	S	S	S	S	S
DK01EC043	Drava_8	water	S	S	S	S	S	S	S	S	S	S	S	S	S	S	S	S	S	S	S	S	S
DK01EC055	Drava_8	water	S	S	S	S	S	S	S	S	S	S	S	S	S	S	S	S	S	S	S	S	S
DK01EC081	Drava_8	water	S	S	S	S	S	S	S	S	S	S	S	S	S	R	R	S	R	S	S	S	S
DK01EC084	Drava_8	water	S	S	S	S	S	S	S	S	S	S	S	S	S	S	S	S	S	S	S	S	S
DK01EC085	Drava_8	water	S	S	S	S	S	S	S	S	S	S	S	S	S	S	S	S	S	S	S	S	S
DK01EC087	Drava_8	water	S	S	S	S	S	S	S	S	S	S	S	S	S	S	S	S	S	S	S	S	S
DK01EC144	Drava_8	sediment	S	R	S	S	S	S	S	S	S	S	S	S	S	S	R	S	S	S	S	S	S
DR01EC013	Drava_8	water	S	S	S	S	S	S	S	S	S	S	S	S	S	S	S	S	S	S	S	S	S
DK01EC018	Drava_9	water	S	S	S	S	S	S	S	S	S	S	S	S	S	S	S	S	S	S	S	S	S
DK01EC049	Drava_9	water	S	S	S	S	S	S	S	S	S	S	S	S	S	S	S	S	S	S	S	S	S
DK01EC092	Drava_9	water	S	S	S	S	S	S	S	S	S	S	S	S	S	S	S	S	S	S	S	S	S
DK01EC019	Drava_10	water	S	S	S	S	S	S	S	S	S	S	S	S	S	S	S	S	S	S	S	S	S
DK01EC069	Drava_10	water	S	S	S	S	S	S	S	S	S	S	S	S	S	S	S	S	S	S	S	S	S
DK01EC076	Drava_10	water	S	S	S	S	S	S	S	S	S	S	S	S	S	S	S	S	S	S	S	S	S
DR01EC130	Drava_10	sediment	S	S	S	S	S	S	S	S	S	S	S	S	S	S	S	S	S	S	S	S	S
DR01EC152	Drava_10	sediment	S	S	S	S	S	S	S	S	S	S	S	S	S	S	S	S	S	S	S	S	S
DR01EC160	Drava_10	sediment	S	S	S	S	S	S	S	S	S	S	S	S	S	S	S	S	S	S	S	S	S
DK01EC021	Drava_11	water	S	S	S	S	S	S	S	S	S	S	S	S	S	S	S	S	S	S	S	S	S
DK01EC022	Drava_11	water	S	S	S	S	S	S	S	S	S	S	S	S	S	S	S	S	S	S	S	S	S
DK01EC024	Drava_11	water	S	S	S	S	S	S	S	S	S	S	S	S	S	S	S	S	S	S	S	S	S
DK01EC034	Drava_11	water	R	R	S	S	S	S	S	S	S	S	S	S	S	S	S	S	S	S	S	R	S
DK01EC036	Drava_11	water	S	S	S	S	S	S	S	S	S	S	S	S	S	S	S	S	S	S	S	S	S
DK01EC067	Drava_11	water	R	R	S	S	S	S	S	S	S	S	S	S	S	S	S	S	S	S	S	S	S
DK01EC071	Drava_11	water	S	S	S	S	S	S	S	S	S	S	S	S	S	S	S	S	S	S	S	S	S
DK01EC072	Drava_11	water	S	S	S	S	S	S	S	S	S	S	S	S	S	S	S	S	S	S	S	S	S
DK01EC074	Drava_11	water	S	S	S	S	S	S	S	S	S	S	S	S	S	S	S	S	S	S	S	S	S
DK01EC075	Drava_11	water	S	S	S	S	S	S	S	S	S	S	S	S	S	S	S	S	S	S	S	S	S
DK01EC088	Drava_11	water	S	S	S	S	S	S	S	S	S	S	S	S	S	S	S	S	S	S	S	S	S
DR01EC100	Drava_11	water	S	S	S	S	S	S	S	S	S	S	S	S	S	S	S	S	S	S	S	S	S
DR01EC153	Drava_11	sediment	S	S	S	S	S	S	S	S	S	S	S	S	S	S	S	S	S	S	S	S	S
DR01EC161	Drava_11	sediment	R	R	S	S	S	S	S	S	S	S	S	S	S	S	S	R	S	S	S	S	S
DK01EC026	Drava_12	water	S	S	S	S	S	S	S	S	S	S	S	S	S	S	S	S	S	S	S	S	S
DK01EC065	Drava_12	water	R	S	S	S	S	S	S	S	S	S	S	S	S	S	S	R	S	S	S	S	S
DK01EC028	Drava_13	water	S	S	S	S	S	S	S	S	S	S	S	S	S	S	S	S	S	S	S	S	S
DK01EC040	Drava_13	water	S	S	S	S	S	S	S	S	S	S	S	S	S	S	S	S	S	S	S	S	S
DR01EC024	Drava_13	water	S	S	S	S	S	S	S	S	S	S	S	S	S	S	S	R	S	S	S	S	S
DR01EC096	Drava_13	water	S	S	S	S	S	S	S	S	S	S	S	S	S	S	S	S	S	S	S	S	S
DR01EC129	Drava_13	sediment	S	S	S	S	S	S	S	S	S	S	S	S	S	S	S	S	S	S	S	S	S
DK01EC035	Drava_14	water	R	R	S	S	S	S	S	S	S	S	S	S	S	R	R	R	S	S	S	S	S
DR01EC032	Drava_14	water	R	R	S	S	S	S	S	S	S	S	S	S	S	S	S	R	S	S	S	R	S
DR01EC128	Drava_14	sediment	S	S	S	S	S	S	S	S	S	S	S	S	S	S	S	S	S	S	S	S	S
DK01EC041	Drava_15	water	S	S	S	S	S	S	S	S	S	S	S	S	S	S	S	S	S	S	S	S	S
DK01EC057	Drava_15	water	S	S	S	S	S	S	S	S	S	S	S	S	S	S	S	S	S	S	S	S	S
DK01EC058	Drava_15	water	S	S	S	S	S	S	S	S	S	S	S	S	S	S	S	S	S	S	S	S	S
DK01EC070	Drava_15	water	S	S	S	S	S	S	S	S	S	S	S	S	S	S	S	S	S	S	S	S	S
DK01EC082	Drava_15	water	S	S	S	S	S	S	S	S	S	S	S	S	S	S	S	S	S	S	S	S	S
DK01EC089	Drava_15	water	S	S	S	S	S	S	S	S	S	S	S	S	S	S	S	S	S	S	S	S	S
DK01EC097	Drava_15	water	S	S	S	S	S	S	S	S	S	S	S	S	S	R	R	R	S	S	S	R	S
DR01EC023	Drava_15	water	S	S	S	S	S	S	S	S	S	S	S	S	S	S	S	S	S	S	S	S	S
DR01EC076	Drava_15	water	S	S	S	S	S	S	S	S	S	S	S	S	S	S	S	S	S	S	S	S	S
DR01EC119	Drava_15	sediment	S	S	S	S	S	S	S	S	S	S	S	S	S	S	S	S	S	S	S	S	S
DR01EC167	Drava_15	water	S	S	S	S	S	S	S	S	S	S	S	S	S	S	S	S	S	S	S	S	S
DK01EC042	Drava_16	water	S	S	S	S	S	S	S	S	S	S	S	S	S	S	S	S	S	S	S	S	S
DK01EC054	Drava_16	water	S	S	S	S	S	S	S	S	S	S	S	S	S	S	S	S	S	S	S	S	S
DK01EC148	Drava_16	sediment	S	S	S	S	S	S	S	S	S	S	S	S	S	S	S	S	S	S	S	S	S
DK01EC044	Drava_17	sediment	S	S	S	S	S	S	S	S	S	S	S	S	S	S	S	S	S	S	S	S	S
DK01EC080	Drava_17	water	R	S	S	S	S	S	S	S	S	S	S	S	S	S	S	S	R	S	S	S	S
DK01EC047	Drava_18	water	S	S	S	S	S	S	S	S	S	S	S	S	S	S	S	S	S	S	S	S	S
DR01EC004	Drava_18	water	S	S	S	S	S	S	S	S	S	S	S	S	S	S	S	S	S	S	S	S	S
DK01EC048	Drava_19	water	S	S	S	S	S	S	S	S	S	S	S	S	S	S	S	S	S	S	S	S	S
DK01EC106	Drava_19	water	R	S	S	S	S	S	S	S	S	S	S	S	S	S	S	S	S	S	S	R	S
DR01EC042	Drava_19	water	R	R	S	S	S	S	S	S	S	S	S	S	S	S	S	R	S	S	S	R	S
DR01EC093	Drava_19	water	R	R	S	S	S	S	S	S	S	S	S	S	S	S	S	S	S	S	S	R	S
DK01EC050	Drava_20	water	R	S	R	R	S	R	S	S	S	S	R	S	S	S	S	S	S	S	S	S	S
DK01EC114	Drava_20	sediment	S	S	S	S	S	S	S	S	S	S	S	S	S	S	S	S	S	S	S	S	S
DK01EC051	Drava_21	water	S	S	S	S	S	S	S	S	S	S	S	S	S	S	R	S	R	S	S	S	S
DK01EC061	Drava_21	water	S	S	S	S	S	S	S	S	S	S	S	S	S	S	S	S	S	S	S	S	S
DK01EC062	Drava_21	water	S	S	S	S	S	S	S	S	S	S	S	S	S	S	S	S	S	S	S	S	S
DR01EC094	Drava_21	water	S	S	S	S	S	S	S	S	S	S	S	S	S	S	S	S	S	S	S	S	S
DK01EC073	Drava_22	water	S	S	S	S	S	S	S	S	S	S	S	S	S	R	S	S	S	S	S	R	S
DR01EC058	Drava_22	water	S	S	S	S	S	S	S	S	S	S	S	S	S	S	S	S	S	S	S	S	S
DK01EC077	Drava_23	water	S	S	S	S	S	S	S	S	S	S	S	S	S	S	S	S	S	S	S	S	S
DK01EC105	Drava_23	water	S	S	S	S	S	S	S	S	S	S	S	S	S	R	R	S	R	S	S	S	S
DR01EC007	Drava_23	water	R	R	S	S	S	S	S	S	S	S	S	S	S	S	R	R	R	S	S	S	S
DK01EC086	Drava_24	water	S	S	S	S	S	S	S	S	S	S	S	S	S	S	S	S	S	S	S	S	S
DR01EC110	Drava_24	water	S	S	S	S	S	S	S	S	S	S	S	S	S	S	S	S	S	S	S	S	S
DK01EC095	Drava_25	water	S	S	S	S	S	S	S	S	S	S	S	S	S	S	S	S	S	S	S	S	S
DK01EC142	Drava_25	sediment	S	S	S	S	S	S	S	S	S	S	S	S	S	S	S	S	S	S	S	S	S
DK01EC108	Drava_26	water	S	S	S	S	S	S	S	S	S	S	S	S	S	S	S	S	S	S	S	S	S
DK01EC151	Drava_26	water	S	S	S	S	S	S	S	S	S	S	S	S	S	S	S	S	S	S	S	S	S
DR01EC080	Drava_26	water	R	R	S	S	S	S	S	S	S	S	S	S	S	S	S	S	S	S	S	S	S
DK01EC111	Drava_27	sediment	S	S	S	S	S	S	S	S	S	S	S	S	S	S	S	S	S	S	S	S	S
DK01EC112	Drava_27	sediment	S	S	S	S	S	S	S	S	S	S	S	S	S	S	S	S	S	S	S	S	S
DK01EC113	Drava_27	sediment	S	S	S	S	S	S	S	S	S	S	S	S	S	S	S	S	S	S	S	S	S
DK01EC115	Drava_27	sediment	S	S	S	S	S	S	S	S	S	S	S	S	S	S	S	S	S	S	S	S	S
DK01EC116	Drava_27	sediment	S	S	S	S	S	S	S	S	S	S	S	S	S	S	S	S	S	S	S	S	S
DK01EC117	Drava_27	sediment	S	S	S	S	S	S	S	S	S	S	S	S	S	S	S	S	S	S	S	S	S
DK01EC118	Drava_27	sediment	S	S	S	S	S	S	S	S	S	S	S	S	S	S	S	S	S	S	S	S	S
DK01EC119	Drava_27	sediment	S	S	S	S	S	S	S	S	S	S	S	S	S	S	S	S	S	S	S	S	S
DK01EC120	Drava_27	sediment	S	S	S	S	S	S	S	S	S	S	S	S	S	S	S	S	S	S	S	S	S
DK01EC121	Drava_27	sediment	S	S	S	S	S	S	S	S	S	S	S	S	S	S	S	S	S	S	S	S	S
DK01EC122	Drava_27	sediment	S	S	S	S	S	S	S	S	S	S	S	S	S	S	S	S	S	S	S	S	S
DK01EC123	Drava_27	sediment	S	S	S	S	S	S	S	S	S	S	S	S	S	S	S	S	S	S	S	S	S
DK01EC143	Drava_28	sediment	R	S	S	S	S	S	R	S	S	S	S	R	S	S	R	S	S	S	S	S	S
DR01EC006	Drava_28	water	S	S	S	S	S	S	S	S	S	S	S	S	S	S	S	S	S	S	S	S	S
DR01EC092	Drava_28	water	R	R	S	S	S	S	S	S	S	S	S	S	S	S	S	R	S	S	S	R	S
DR01EC122	Drava_28	sediment	S	S	S	S	S	S	S	S	S	S	S	S	S	S	S	S	S	S	S	S	S
DR01EC157	Drava_28	sediment	S	S	S	S	S	S	S	S	S	S	S	S	S	S	S	S	S	S	S	S	S
DR01EC001	Drava_29	water	S	S	S	S	S	S	S	S	S	S	S	S	S	S	S	S	S	S	S	S	S
DR01EC030	Drava_29	water	S	S	S	S	S	S	S	S	S	S	S	S	S	S	S	S	S	S	S	S	S
DR01EC031	Drava_29	water	S	S	S	S	S	S	S	S	S	S	S	S	S	S	S	S	S	S	S	S	S
DR01EC104	Drava_29	water	S	S	S	S	S	S	S	S	S	S	S	S	S	S	S	S	S	S	S	S	S
DR01EC125	Drava_29	sediment	S	S	S	S	S	S	S	S	S	S	S	S	S	S	S	S	S	S	S	S	S
DR01EC002	Drava_30	water	R	S	S	S	S	S	S	S	S	S	S	S	S	S	S	S	S	S	S	S	S
DR01EC003	Drava_30	water	S	S	S	S	S	S	S	S	S	S	S	S	S	S	S	S	S	S	S	S	S
DR01EC005	Drava_30	water	S	S	S	S	S	S	S	S	S	S	S	S	S	S	S	S	S	S	S	S	S
DR01EC008	Drava_30	water	S	S	S	S	S	S	S	S	S	S	S	S	S	S	S	S	S	S	S	S	S
DR01EC014	Drava_30	water	S	S	S	S	S	S	S	S	S	S	S	S	S	S	S	S	S	S	S	S	S
DR01EC015	Drava_30	water	S	S	S	S	S	S	S	S	S	S	S	S	S	S	S	S	S	S	S	S	S
DR01EC016	Drava_30	water	S	S	S	S	S	S	S	S	S	S	S	S	S	S	S	S	S	S	S	S	S
DR01EC017	Drava_30	water	S	S	S	S	S	S	S	S	S	S	S	S	S	S	S	S	S	S	S	S	S
DR01EC021	Drava_30	water	S	S	S	S	S	S	S	S	S	S	S	S	S	S	S	S	S	S	S	S	S
DR01EC022	Drava_30	water	S	S	S	S	S	S	S	S	S	S	S	S	S	S	S	S	S	S	S	S	S
DR01EC026	Drava_30	water	S	S	S	S	S	S	S	S	S	S	S	S	S	S	S	S	S	S	S	S	S
DR01EC028	Drava_30	water	S	S	S	S	S	S	S	S	S	S	S	S	S	S	S	S	S	S	S	S	S
DR01EC036	Drava_30	water	R	R	R	R	S	R	S	S	R	S	R	S	S	S	S	S	R	S	S	S	S
DR01EC039	Drava_30	water	S	S	S	S	S	S	S	S	S	S	S	S	S	S	S	S	S	S	S	S	S
DR01EC040	Drava_30	water	S	S	S	S	S	S	S	S	S	S	S	S	S	S	S	S	S	S	S	S	S
DR01EC041	Drava_30	water	S	S	S	S	S	S	S	S	S	S	S	S	S	S	S	S	S	S	S	S	S
DR01EC043	Drava_30	water	S	S	S	S	S	S	S	S	S	S	S	S	S	S	S	S	S	S	S	S	S
DR01EC044	Drava_30	water	S	S	S	S	S	S	S	S	S	S	S	S	S	S	S	S	S	S	S	S	S
DR01EC077	Drava_30	water	S	S	S	S	S	S	S	S	S	S	S	S	S	S	S	S	S	S	S	S	S
DR01EC078	Drava_30	water	S	S	S	S	S	S	S	S	S	S	S	S	S	S	S	S	S	S	S	S	S
DR01EC081	Drava_30	water	S	S	S	S	S	S	S	S	S	S	S	S	S	S	S	S	S	S	S	S	S
DR01EC082	Drava_30	water	S	S	S	S	S	S	S	S	S	S	S	S	S	S	S	S	S	S	S	S	S
DR01EC083	Drava_30	water	S	S	S	S	S	S	S	S	S	S	S	S	S	S	S	S	S	S	S	S	S
DR01EC084	Drava_30	water	S	S	S	S	S	S	S	S	S	S	S	S	S	S	S	S	S	S	S	S	S
DR01EC087	Drava_30	water	S	S	S	S	S	S	S	S	S	S	S	S	S	S	S	S	S	S	S	S	S
DR01EC088	Drava_30	water	S	S	S	S	S	S	S	S	S	S	S	S	S	S	S	S	S	S	S	S	S
DR01EC089	Drava_30	water	S	S	S	S	S	S	S	S	S	S	S	S	S	S	S	S	S	S	S	S	S
DR01EC090	Drava_30	water	S	S	S	S	S	S	S	S	S	S	S	S	S	S	S	S	S	S	S	S	S
DR01EC097	Drava_30	water	S	S	S	S	S	S	S	S	S	S	S	S	S	S	S	S	S	S	S	S	S
DR01EC098	Drava_30	water	S	S	S	S	S	S	S	S	S	S	S	S	S	S	S	S	S	S	S	S	S
DR01EC099	Drava_30	water	S	S	S	S	S	S	S	S	S	S	S	S	S	S	S	S	S	S	S	S	S
DR01EC101	Drava_30	water	S	S	S	S	S	S	S	S	S	S	S	S	S	S	S	S	S	S	S	S	S
DR01EC102	Drava_30	water	S	S	S	S	S	S	S	S	S	S	S	S	S	S	S	S	S	S	S	S	S
DR01EC105	Drava_30	water	S	S	S	S	S	S	S	S	S	S	S	S	S	S	S	S	S	S	S	S	S
DR01EC109	Drava_30	water	S	S	S	S	S	S	S	S	S	S	S	S	S	S	S	S	S	S	S	S	S
DR01EC111	Drava_30	water	S	S	S	S	S	S	S	S	S	S	S	S	S	S	S	S	S	S	S	S	S
DR01EC137	Drava_30	water	S	S	S	S	S	S	S	S	S	S	S	S	S	S	S	S	S	S	S	S	S
DR01EC162	Drava_30	sediment	S	S	S	S	S	S	S	S	S	S	S	S	S	S	S	S	S	S	S	S	S
DR01EC168	Drava_30	water	S	S	S	S	S	S	S	S	S	S	S	S	S	S	S	S	S	S	S	S	S
DR01EC170	Drava_30	water	S	S	S	S	S	S	S	S	S	S	S	S	S	S	S	S	S	S	S	S	S
DR01EC171	Drava_30	water	S	S	S	S	S	S	S	S	S	S	S	S	S	S	S	S	S	S	S	S	S
DR01EC172	Drava_30	water	S	S	S	S	S	S	S	S	S	S	S	S	S	S	S	S	S	S	S	S	S
DR01EC173	Drava_30	water	S	S	S	S	S	S	S	S	S	S	S	S	S	S	S	S	S	S	S	S	S
DR01EC174	Drava_30	water	S	S	S	S	S	S	S	S	S	S	S	S	S	S	S	S	S	S	S	S	S
DR01EC175	Drava_30	water	S	S	S	S	S	S	S	S	S	S	S	S	S	S	S	S	S	S	S	S	S
DR01EC012	Drava_31	water	R	R	R	R	R	R	S	S	R	S	R	R	S	R	R	R	R	S	S	R	R
DR01EC116	Drava_31	sediment	S	S	S	S	S	S	S	S	S	S	S	S	S	S	S	S	S	S	S	S	S
DR01EC046	Drava_32	water	S	S	S	S	S	S	S	S	S	S	S	S	S	S	S	S	S	S	S	S	S
DR01EC086	Drava_32	water	S	S	S	S	S	S	S	S	S	S	S	S	S	S	S	S	S	S	S	S	S
DR01EC124	Drava_32	sediment	S	S	S	S	S	S	S	S	S	S	S	S	S	S	S	S	S	S	S	S	S
DR01EC095	Drava_33	water	S	S	S	S	S	S	S	S	S	S	S	S	S	S	S	R	S	S	S	S	S
DR01EC121	Drava_33	sediment	S	S	S	S	S	S	S	S	S	S	S	S	S	S	S	S	S	S	S	S	S
DK01EC003	Drava_Si	water	S	S	S	S	S	S	S	S	S	S	S	S	S	S	S	S	S	S	S	S	S
DK01EC004	Drava_Si	water	S	R	S	S	S	S	S	S	S	S	S	S	S	S	S	S	S	S	S	S	S
DK01EC011	Drava_Si	sediment	S	S	S	S	S	S	S	S	S	S	S	S	S	S	S	S	S	S	S	S	S
DK01EC013	Drava_Si	water	R	S	S	S	S	S	S	S	S	S	S	S	S	S	S	S	S	S	S	R	S
DK01EC020	Drava_Si	water	S	S	S	S	S	S	S	S	S	S	S	S	S	S	S	S	S	S	S	S	S
DK01EC023	Drava_Si	water	R	R	R	S	R	S	S	S	S	S	S	S	S	R	S	S	R	S	S	S	S
DK01EC025	Drava_Si	water	R	R	S	S	S	S	S	S	S	S	S	S	S	R	R	R	R	S	S	S	R
DK01EC030	Drava_Si	water	R	R	S	S	S	S	S	S	S	S	S	S	S	S	S	S	S	S	S	R	S
DK01EC031	Drava_Si	water	S	S	S	S	S	S	S	S	S	S	S	S	S	S	S	S	S	S	S	S	S
DK01EC032	Drava_Si	water	S	S	S	S	S	S	S	S	S	S	S	S	S	S	S	S	S	S	S	S	S
DK01EC033	Drava_Si	water	S	S	S	S	S	S	S	S	S	S	S	S	S	S	S	S	S	S	S	S	S
DK01EC037	Drava_Si	water	S	S	S	S	S	S	S	S	S	S	S	S	R	S	S	S	S	S	S	S	S
DK01EC038	Drava_Si	water	S	S	S	S	S	S	S	S	S	S	S	S	S	S	S	S	S	S	S	S	S
DK01EC039	Drava_Si	water	S	R	S	S	S	S	S	S	S	S	S	S	S	S	S	S	S	S	S	S	S
DK01EC045	Drava_Si	water	S	S	S	S	S	S	S	S	S	S	S	S	S	S	S	S	S	S	S	R	S
DK01EC046	Drava_Si	water	S	S	S	S	S	S	S	S	S	S	S	S	S	S	S	R	S	S	S	S	S
DK01EC060	Drava_Si	water	S	S	S	S	S	S	S	S	S	S	S	S	S	S	S	S	S	S	S	S	S
DK01EC063	Drava_Si	water	S	S	S	S	S	S	S	S	S	S	S	S	S	S	S	S	S	S	S	S	S
DK01EC064	Drava_Si	water	S	S	S	S	S	S	S	S	S	S	S	S	S	S	S	S	S	S	S	S	S
DK01EC068	Drava_Si	water	R	R	S	R	S	S	S	S	S	S	S	S	S	R	R	S	R	S	S	S	R
DK01EC079	Drava_Si	water	S	S	S	S	S	S	S	S	S	S	S	S	S	S	S	S	S	S	S	S	S
DK01EC090	Drava_Si	water	S	S	S	S	S	S	S	S	S	S	S	S	S	S	S	S	S	S	S	S	S
DK01EC098	Drava_Si	water	S	S	S	S	S	S	S	S	S	S	S	S	S	S	S	S	S	S	S	S	S
DK01EC099	Drava_Si	water	S	S	S	S	S	S	S	S	S	S	S	S	S	S	S	S	S	S	S	S	S
DK01EC100	Drava_Si	water	S	S	S	S	S	S	S	S	S	S	S	S	S	S	S	S	S	S	S	S	S
DK01EC102	Drava_Si	water	S	S	S	S	S	S	S	S	S	S	S	S	S	S	S	S	S	S	S	S	S
DK01EC103	Drava_Si	water	S	S	S	S	S	S	S	S	S	S	S	S	S	S	S	S	S	S	S	S	S
DK01EC104	Drava_Si	water	R	S	S	S	S	S	S	S	S	S	S	S	S	S	S	S	S	S	S	S	S
DK01EC109	Drava_Si	water	S	S	S	S	S	S	S	S	S	S	S	S	S	S	S	S	S	S	S	S	S
DK01EC110	Drava_Si	sediment	S	S	S	S	S	S	S	S	S	S	S	S	S	S	S	S	S	S	S	S	S
DK01EC124	Drava_Si	sediment	S	S	S	S	S	S	S	S	S	S	S	S	S	S	S	S	S	S	S	S	S
DK01EC125	Drava_Si	water	S	S	S	S	S	S	S	S	S	S	S	S	S	S	S	S	S	S	S	S	S
DK01EC126	Drava_Si	water	S	S	S	S	S	S	S	S	S	S	S	S	S	S	S	S	S	S	S	S	S
DK01EC127	Drava_Si	water	S	S	S	S	S	S	S	S	S	S	S	S	S	S	S	S	S	S	S	S	S
DK01EC136	Drava_Si	sediment	S	S	S	S	S	S	S	S	S	S	S	S	S	S	S	S	S	S	S	S	S
DK01EC145	Drava_Si	sediment	S	S	S	S	S	S	S	S	S	S	S	S	S	S	R	S	S	S	S	S	S
DK01EC147	Drava_Si	sediment	S	S	S	S	S	S	S	S	S	S	S	S	S	S	R	S	S	S	S	S	S
DK01EC149	Drava_Si	sediment	R	S	S	S	S	S	S	S	S	S	S	S	S	S	S	S	S	S	S	S	S
DK01EC152	Drava_Si	sediment	S	S	S	S	S	S	S	S	S	S	S	S	S	S	S	S	S	S	S	S	S
DK01EC153	Drava_Si	water	S	S	S	S	S	S	S	S	S	S	S	S	S	S	S	S	S	S	S	S	S
DR01EC010	Drava_Si	water	R	R	S	S	S	S	S	S	S	S	S	S	S	S	S	S	S	S	S	R	S
DR01EC011	Drava_Si	water	S	S	S	S	S	S	S	S	S	S	S	S	S	S	S	S	S	S	S	S	S
DR01EC019	Drava_Si	water	S	S	S	S	S	S	S	S	S	S	S	S	S	S	S	S	S	S	S	S	S
DR01EC020	Drava_Si	water	S	S	S	S	S	S	S	S	S	S	S	S	S	S	S	S	S	S	S	S	S
DR01EC033	Drava_Si	water	R	R	S	S	S	S	S	S	S	S	S	S	S	S	S	S	S	S	S	R	S
DR01EC034	Drava_Si	water	S	S	S	S	S	S	S	S	S	S	S	S	S	S	S	S	S	S	S	S	S
DR01EC035	Drava_Si	water	S	S	S	S	S	S	S	S	S	S	S	S	S	S	S	S	S	S	S	S	S
DR01EC037	Drava_Si	water	S	S	S	S	S	S	S	S	S	S	S	S	S	S	S	S	S	S	S	S	S
DR01EC045	Drava_Si	water	S	S	S	S	S	S	S	S	S	S	S	S	S	S	S	S	S	S	S	S	S
DR01EC059	Drava_Si	water	S	S	S	S	S	S	S	S	S	S	S	S	S	S	S	S	S	S	S	S	S
DR01EC075	Drava_Si	water	S	S	S	S	S	S	S	S	S	S	S	S	S	S	S	S	S	S	S	S	S
DR01EC079	Drava_Si	water	R	R	S	S	S	S	S	S	S	S	S	S	S	S	S	S	S	S	S	R	S
DR01EC103	Drava_Si	water	S	S	S	S	S	S	S	S	S	S	S	S	S	S	S	S	S	S	S	S	S
DR01EC115	Drava_Si	sediment	S	S	S	S	S	S	S	S	S	S	S	S	S	S	S	S	S	S	S	S	S
DR01EC117	Drava_Si	sediment	R	R	S	S	S	S	S	S	S	S	S	S	S	S	S	R	S	S	S	R	S
DR01EC118	Drava_Si	sediment	S	S	S	S	S	S	S	S	S	S	S	S	S	S	S	S	S	S	S	S	S
DR01EC120	Drava_Si	sediment	S	S	S	S	S	S	S	S	S	S	S	S	S	S	S	S	S	S	S	S	S
DR01EC123	Drava_Si	sediment	R	R	S	S	S	S	S	S	S	S	S	R	S	S	S	R	S	S	S	R	S
DR01EC127	Drava_Si	sediment	S	S	S	S	S	S	S	S	S	S	S	S	S	S	S	S	S	S	S	S	S
DR01EC154	Drava_Si	sediment	R	R	S	S	S	S	S	S	S	S	S	S	S	S	S	R	S	S	S	R	S
DR01EC155	Drava_Si	sediment	S	S	S	S	S	S	S	S	S	S	S	S	S	S	S	S	S	S	S	S	S
DR01EC159	Drava_Si	sediment	S	S	S	S	S	S	S	S	S	S	S	S	S	S	S	S	S	S	S	S	S
DR01EC164	Drava_Si	sediment	S	S	S	S	S	S	S	S	S	S	S	S	S	S	S	S	S	S	S	R	S
DR01EC165	Drava_Si	sediment	S	S	S	S	S	S	S	S	S	S	S	S	S	R	R	S	S	S	S	S	R
DR01EC176	Drava_Si	water	S	S	S	S	S	S	S	S	S	S	S	S	S	R	R	R	R	S	S	S	S
